# Supplementary material for: Arylation ofgem-difluoroalkenes using a Pd/Cu Co-catalytic system that avoids β-fluoride elimination
Source: Royal Society of Chemistry journal article supplement (doi:10.1039/d0sc05192f), 2020-11-25
Supplement: d0sc05192f3.pdf [file d0sc05192f3.pdf]

## Supplementary Information – Computational Details

# Arylation of *gem*-Difluoroalkenes Using a Pd/Cu Co-Catalytic System that Avoids $\beta$ -Fluoride Elimination

Kedong Yuan<sup>a</sup>, Taisiia Feoktistova<sup>b</sup>, Ryan A. Altman<sup>a\*</sup>, Paul Ha-Yeon Cheong<sup>b\*</sup>

### Table of Contents

|                                                                                |    |
|--------------------------------------------------------------------------------|----|
| 1. Complete Authorship of Gaussian 16 .....                                    | 2  |
| 2. General Computational Procedure .....                                       | 2  |
| 3. Exploration of the Aryl Addition Step .....                                 | 2  |
| 4. Exploration of Pd Sphere and Conjugation Effect .....                       | 3  |
| 5. Model System .....                                                          | 4  |
| 6. Computed Geometries, Dispersion & Solvation Corrections, and Energies ..... | 5  |
| 7. References .....                                                            | 45 |

## 1. Complete Authorship of Gaussian 16

Gaussian 16, Revision **A.03**, M. J. Frisch, G. W. Trucks, H. B. Schlegel, G. E. Scuseria, M. A. Robb, J. R. Cheeseman, G. Scalmani, V. Barone, G. A. Petersson, H. Nakatsuji, X. Li, M. Caricato, A. V. Marenich, J. Bloino, B. G. Janesko, R. Gomperts, B. Mennucci, H. P. Hratchian, J. V. Ortiz, A. F. Izmaylov, J. L. Sonnenberg, D. Williams-Young, F. Ding, F. Lipparini, F. Egidi, J. Goings, B. Peng, A. Petrone, T. Henderson, D. Ranasinghe, V. G. Zakrzewski, J. Gao, N. Rega, G. Zheng, W. Liang, M. Hada, M. Ehara, K. Toyota, R. Fukuda, J. Hasegawa, M. Ishida, T. Nakajima, Y. Honda, O. Kitao, H. Nakai, T. Vreven, K. Throssell, J. A. Montgomery, Jr., J. E. Peralta, F. Ogliaro, M. J. Bearpark, J. J. Heyd, E. N. Brothers, K. N. Kudin, V. N. Staroverov, T. A. Keith, R. Kobayashi, J. Normand, K. Raghavachari, A. P. Rendell, J. C. Burant, S. S. Iyengar, J. Tomasi, M. Cossi, J. M. Millam, M. Klene, C. Adamo, R. Cammi, J. W. Ochterski, R. L. Martin, K. Morokuma, O. Farkas, J. B. Foresman, and D. J. Fox, Gaussian, Inc., Wallingford CT, 2016.

GaussView, Version **6.1**, Roy Dennington, Todd A. Keith, and John M. Millam, Semichem Inc., Shawnee Mission, KS, 2016.

## 2. General Computational Procedure

Trimethylamine was used in place of triethylamine in all relevant computational models. Manual conformation search was performed to locate all relevant structures. All conformers were optimized using Gaussian 16 computational package (see above reference). We used B3LYP<sup>i</sup> with the LanL2DZ<sup>ii</sup> basis set for palladium, and 6-31G(d)<sup>iii</sup> for all other atoms at 1 atm and 393.15 K (120 °C) in 1,4-dioxane using PCM (Polarizable Continuum Model)<sup>iv</sup> in order to match experimental reaction conditions as close as possible. D3BJ corrections were applied using D3BJ software.<sup>v</sup> All reported computed barriers are derived from differences in the final free energies and reported in kcal/mol as converted from hartrees (1 Ha = 627.5095 kcal/mol) and all distances are in Ångströms (Å). All images were generated with CYLview.<sup>vi</sup>

## 3. Exploration of the Aryl Addition Step

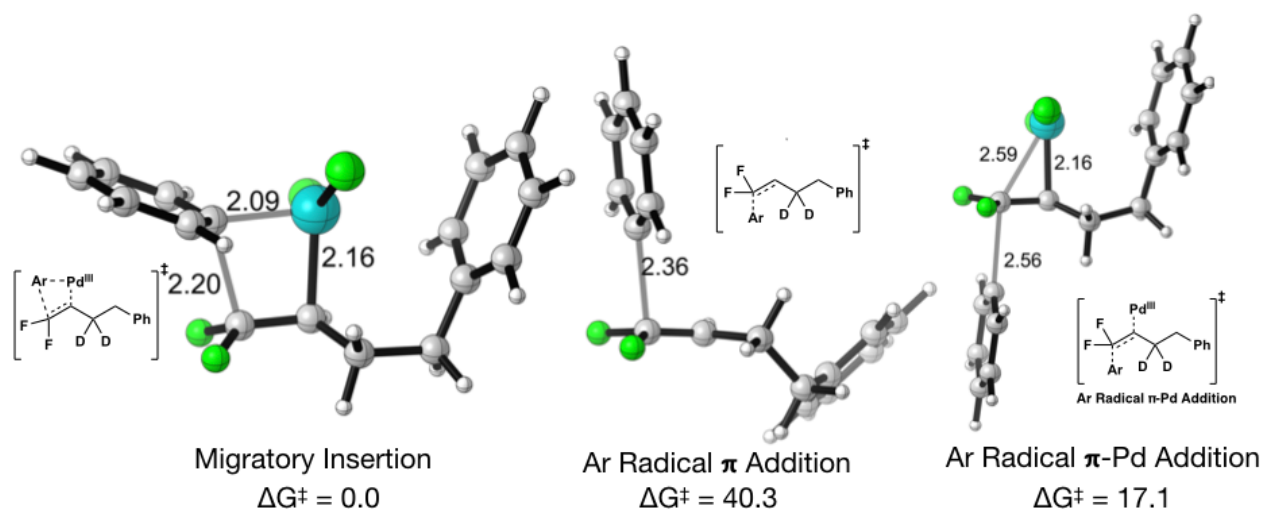

**Figure S1.** CYLview image of the three TSs for the three possible pathways for the aryl addition step.

We computed TSs for three different arylation mechanisms (Figure S1). Migratory insertion is the most favorable mechanism with aryl radical  $\pi$ -Pd addition being 17.1 kcal/mol higher in Energy. Aryl radical  $\pi$  addition without Pd is the least favorable pathway at 40.3 kcal/mol.

#### 4. Exploration of the Pd Sphere and Conjugation Effect

$\beta$ -H Elimination TSs

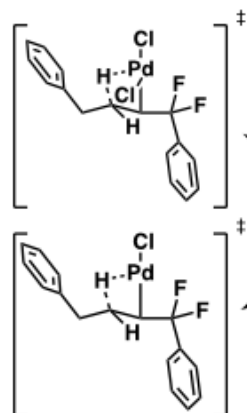

$\beta$ -F Elimination TSs

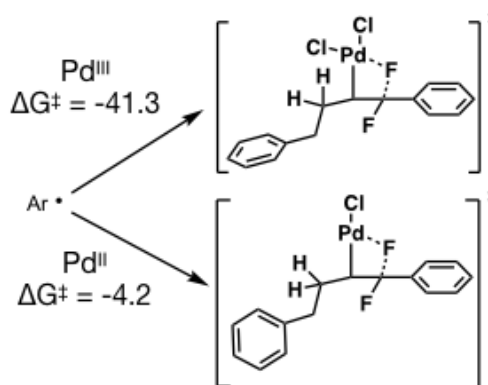

For the  $\beta$ -H/F elimination process we considered both  $\text{Pd}^{\text{III}}$  and  $\text{Pd}^{\text{II}}$  mechanisms (Figure S2).  $\text{Pd}^{\text{III}}$  TSs were significantly lower in energy than  $\text{Pd}^{\text{II}}$  TSs for both  $\beta$ -H/F eliminations, therefore we concluded that  $\text{Pd}^{\text{III}}$  is the operative mechanism.

Figure S2.  $\text{Pd}^{\text{III}}$  vs  $\text{Pd}^{\text{II}}$ .

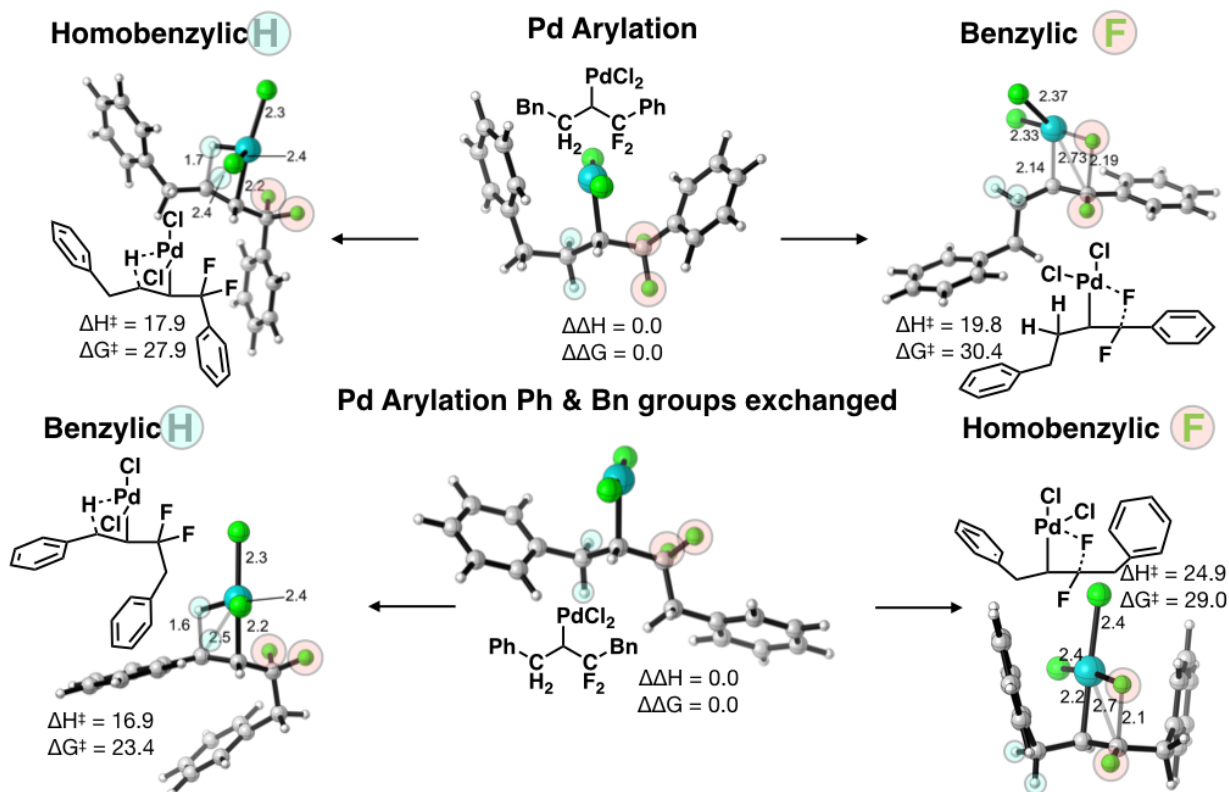

**Figure S3.** Pd<sup>III</sup> β-H/F elimination TSs. Top row has TSs for the original substrate, bottom row has TSs for a model substrate in which phenyl and benzyl substituents are exchanged.

While investigating why β-H elimination is more favorable than β-F elimination, we considered the effects of chemoselectivity (Figure S3). β-H elimination was shown to be favored over β-F elimination regardless of whether it was in benzylic or homobenzylic position.

Additionally, we considered Pd<sup>II</sup> as active catalyst (Figure S4). While β-H elimination was shown to be favored over β-F elimination for Pd<sup>II</sup> regardless of whether H was in benzylic or homobenzylic position, overall energies for this mechanism were higher than for the Pd<sup>III</sup> mechanism.

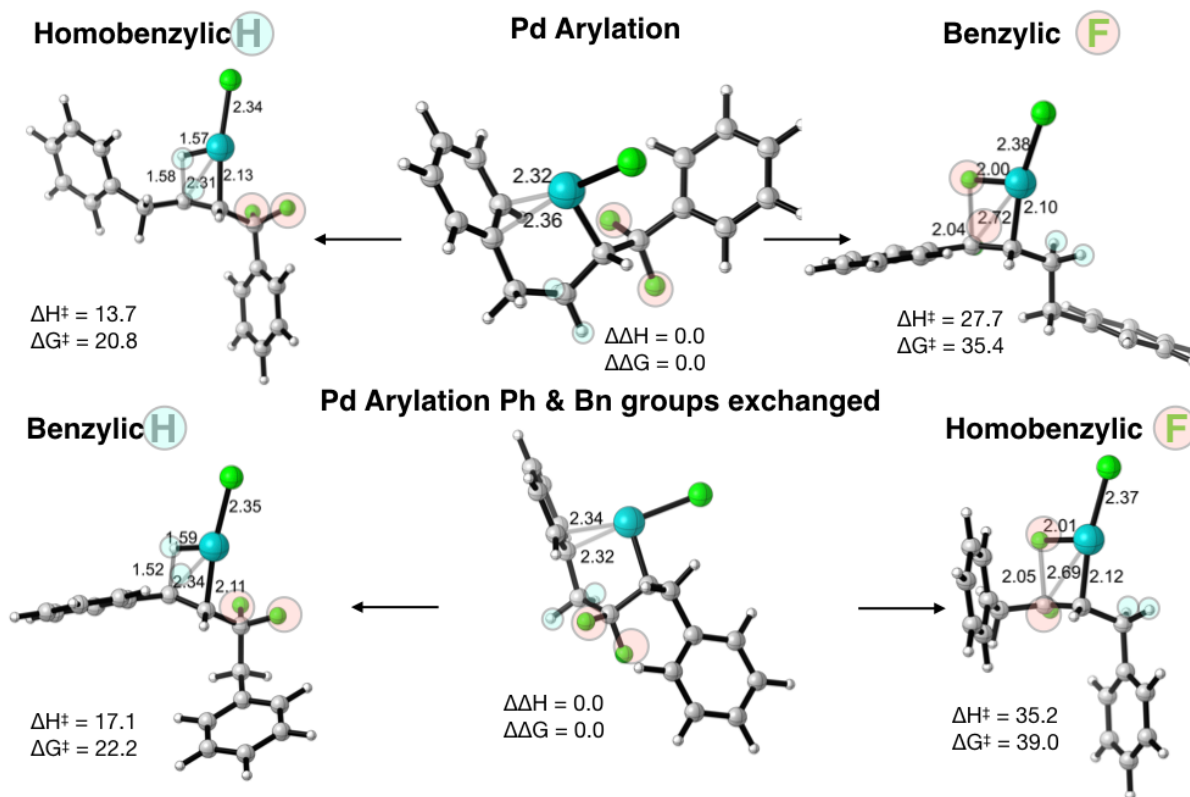

**Figure S4.** Pd<sup>II</sup> β-H/F elimination TSs. Top row has TSs for the original substrate, bottom row has TSs for a model substrate in which phenyl and benzyl substituents are exchanged.

## 5. Model System

While investigating this reaction we computed energies for ground state model transformations (Figure S5). This model reveals that Pd-F bond is much weaker than Pd-H bond, as well as that C-F bond is much weaker than C-H bond.

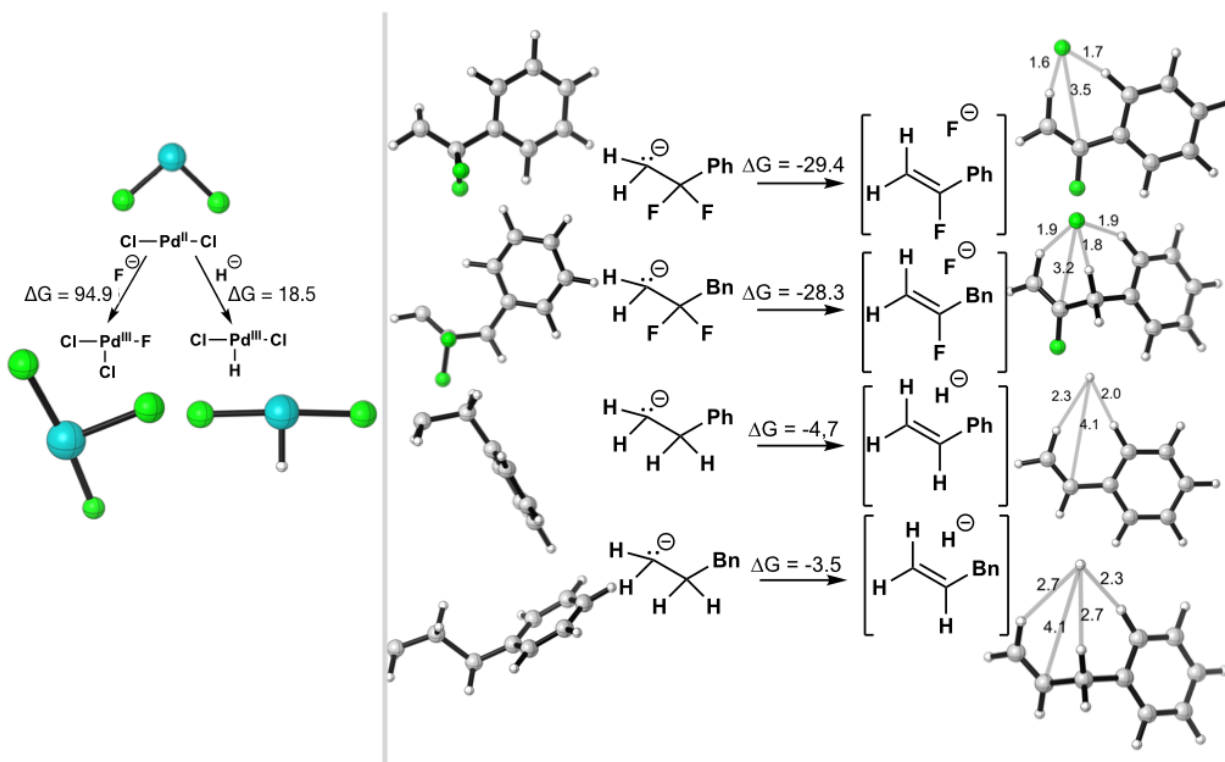

**Figure S5.** Model system. B3LYP/6-31G(d) & LANL2DZ/PCM(1,4-dioxane)//B3LYP/6-31G(d)++ & LANL2DZ/PCM(1,4-dioxane) at 393 K w/D3BJ corrections.

## 6. Computed Geometries, Dispersion & Solvation Corrections, and Energies

*Manuscript TS Structures*

### β-H Elimination-TS

Using Gaussian 16: ES64L-G16RevA.03 25-Dec-2016

```
# b3lyp/gen pseudo=read 6D 10F gfprint gfinput
scf=(direct,tight,maxcycle=300,xqc)
opt=(maxcycle=250,ts,calcfc,noeigentest) freq=noraman
SCRF=(PCM,SOLVENT=1,4-dioxane) iop(1/8=18) Temperature=393.15
#N Geom=AllCheck Guess=TCheck SCRf=Check Test GenChk UB3LYP/ChkBas Freq
```

```
Pointgroup= C1 Stoichiometry= C16H15Cl2F2Pd(2) C1[X(C16H15Cl2F2Pd)] #Atoms= 36
Charge = 0 Multiplicity = 2
```

```
SCF Energy= -1865.56473387 Predicted Change= -6.171845D-10
```

```
Optimization completed. {Found 2 times}
Item Max Val. Criteria Pass? RMS Val. Criteria Pass?
Force 0.00000 || 0.00045 [ YES ] 0.00000 || 0.00030 [ YES ]
Displ 0.00030 || 0.00180 [ YES ] 0.00030 || 0.00180 [ YES ]
```

Atomic Coordinates (Angstroms)

| Type | X         | Y         | Z         |
|------|-----------|-----------|-----------|
| C    | -2.088519 | -0.448670 | -0.550960 |
| C    | -3.327019 | 0.358180  | -0.237620 |
| F    | -2.359250 | -1.791780 | -0.413620 |
| F    | -1.705159 | -0.248930 | -1.858180 |
| C    | -0.922279 | -0.116821 | 0.360240  |
| H    | -1.086839 | -0.341860 | 1.410770  |
| C    | 0.055071  | 0.833629  | 0.010780  |
| H    | -0.023359 | 1.284149  | -0.978980 |
| H    | 1.327031  | -0.050551 | -0.584160 |
| C    | 0.828151  | 1.619229  | 1.055420  |
| H    | 0.179082  | 2.468199  | 1.316750  |
| H    | 0.937811  | 1.008089  | 1.955890  |
| Pd   | 0.734271  | -1.472201 | -0.218410 |
| Cl   | 2.276460  | -2.887681 | -1.255610 |
| C    | -3.609579 | 1.525970  | -0.955560 |
| H    | -2.962738 | 1.832390  | -1.770890 |
| C    | -4.738548 | 2.278911  | -0.635160 |
| H    | -4.962968 | 3.178451  | -1.200850 |
| C    | -5.580228 | 1.874211  | 0.403450  |
| H    | -6.458678 | 2.463211  | 0.651000  |
| C    | -5.295109 | 0.710071  | 1.120930  |
| H    | -5.951749 | 0.388831  | 1.923980  |
| H    | -3.954859 | -0.961520 | 1.352010  |
| C    | 2.172072  | 2.125879  | 0.571060  |
| C    | -4.169149 | -0.048840 | 0.804890  |
| C    | 3.337591  | 1.391598  | 0.831570  |
| H    | 3.277391  | 0.474638  | 1.412550  |
| C    | 4.573502  | 1.834828  | 0.355920  |
| H    | 5.468691  | 1.256858  | 0.566920  |
| C    | 4.657632  | 3.016448  | -0.382350 |
| H    | 5.619542  | 3.362028  | -0.750620 |
| C    | 3.501592  | 3.756768  | -0.641380 |
| H    | 3.561652  | 4.681528  | -1.208700 |
| C    | 2.266742  | 3.313609  | -0.166100 |
| H    | 1.371352  | 3.900339  | -0.362140 |
| Cl   | 1.046500  | -1.995091 | 2.143180  |

---

Statistical Thermodynamic Analysis

Temperature= 393.150 Kelvin      Pressure= 1.00000 Atm

---

SCF Energy= -1865.56473387      Predicted Change= -6.171845D-10

Zero-point correction (ZPE)= -1865.2996      0.26506

Internal Energy (U)= -1865.2651      0.29960

Enthalpy (H)= -1865.2638      0.30084

Gibbs Free Energy (G)= -1865.3826      0.18208

Entropy (S)= 0.00030208

---

Frequencies -- -700.0611            18.3528            29.5620

### $\beta$ -F Elimination-TS

-----  
Using Gaussian 16: ES64L-G16RevA.03 25-Dec-2016  
=====

```
# b3lyp/gen pseudo=read 6D 10F gfprint ginput
scf=(direct,tight,maxcycle=300,xqc)
opt=(maxcycle=250,ts,calcfc,noeigentest) freq=noraman
SCRF=(PCM,SOLVENT=1,4-dioxane) iop(1/8=18) Temperature=393.15
#N Geom=AllCheck Guess=TCheck SCRf=Check Test GenChk UB3LYP/ChkBas Freq
```

-----  
Pointgroup= C1    Stoichiometry= C16H15Cl2F2Pd(2)    C1[X(C16H15Cl2F2Pd)]    #Atoms= 36  
Charge = 0    Multiplicity = 2  
-----

SCF Energy= -1865.56569559      Predicted Change= -2.251110D-08  
=====

Optimization completed on the basis of negligible forces.      {Found    2    times}

| Item  | Max Val. | Criteria | Pass?   | RMS Val. | Criteria | Pass?   |
|-------|----------|----------|---------|----------|----------|---------|
| Force | 0.00000  | 0.00045  | [ YES ] | 0.00000  | 0.00030  | [ YES ] |
| Displ | 0.04810  | 0.00180  | [ NO ]  | 0.04810  | 0.00180  | [ NO ]  |

-----  
Atomic      Coordinates (Angstroms)  
Type    X      Y      Z  
-----

|    |           |           |           |
|----|-----------|-----------|-----------|
| C  | 1.334468  | -0.126434 | 0.134446  |
| C  | 2.118331  | -1.381850 | 0.612447  |
| H  | 1.735566  | -2.266592 | 0.089983  |
| H  | 1.929804  | -1.532029 | 1.682652  |
| C  | 3.605387  | -1.244918 | 0.365079  |
| H  | 1.721714  | 0.755916  | 0.650194  |
| H  | 1.497723  | 0.024243  | -0.936325 |
| C  | -0.148487 | -0.236941 | 0.434239  |
| H  | -0.397744 | -0.261625 | 1.494509  |
| C  | -0.952429 | -1.129492 | -0.361964 |
| F  | -0.374759 | -1.611545 | -1.443149 |
| F  | -1.806166 | 0.469579  | -1.596911 |
| C  | -2.202478 | -1.751231 | -0.002288 |
| Pd | -1.122258 | 1.586716  | -0.104605 |
| Cl | -0.537438 | 2.638576  | 1.890646  |
| Cl | -0.285049 | 3.272868  | -1.549766 |
| C  | 4.437083  | -0.643236 | 1.319220  |
| H  | 4.011195  | -0.295869 | 2.258200  |
| C  | 5.803314  | -0.488809 | 1.080385  |
| H  | 6.433242  | -0.022591 | 1.833273  |
| C  | 6.359406  | -0.935079 | -0.120369 |
| H  | 7.423349  | -0.817132 | -0.306909 |
| C  | 5.540869  | -1.535990 | -1.078773 |
| H  | 5.965415  | -1.888971 | -2.014878 |
| C  | 4.174915  | -1.688411 | -0.836054 |

|   |           |           |           |
|---|-----------|-----------|-----------|
| H | 3.543529  | -2.160167 | -1.586130 |
| C | -2.770036 | -2.707168 | -0.873370 |
| H | -2.266151 | -2.954641 | -1.800004 |
| C | -3.970422 | -3.320658 | -0.542389 |
| H | -4.404612 | -4.054467 | -1.213665 |
| C | -4.620468 | -2.987495 | 0.650717  |
| H | -5.560925 | -3.467192 | 0.905327  |
| C | -4.068613 | -2.036960 | 1.518727  |
| H | -4.578867 | -1.779227 | 2.441046  |
| C | -2.867892 | -1.419799 | 1.200445  |
| H | -2.456432 | -0.678628 | 1.877132  |

---

Statistical Thermodynamic Analysis

Temperature= 393.150 Kelvin    Pressure= 1.00000 Atm

---

SCF Energy= -1865.56569559    Predicted Change= -2.251110D-08  
Zero-point correction (ZPE)= -1865.2957    0.26998  
Internal Energy (U)= -1865.2615    0.30413  
Enthalpy (H)= -1865.2603    0.30538  
Gibbs Free Energy (G)= -1865.3796    0.18600  
Entropy (S)= 0.00030364

---

Frequencies -- -144.7880                    4.0036                    25.1144

*Arylation Step TS Structures*

**Migratory Insertion TS**

---

Using Gaussian 16: ES64L-G16RevA.03 25-Dec-2016

---

```
# b3lyp/gen pseudo=read 6D 10F gfprint gfinput
scf=(direct,tight,maxcycle=300,xqc)
opt=(maxcycle=250,ts,calcfc,noeigentest) freq=noraman
SCRF=(PCM,SOLVENT=1,4-dioxane) iop(1/8=18) Temperature=393.15
#N Geom=AllCheck Guess=TCheck SCRf=Check Test GenChk UB3LYP/ChkBas Freq
```

---

Pointgroup= C1    Stoichiometry= C16H15Cl2F2Pd(2)    C1[X(C16H15Cl2F2Pd)]    #Atoms= 36  
Charge = 0    Multiplicity = 2

---

SCF Energy= -1865.53392473                    Predicted Change= -1.451323D-08

---

|                         |          |          |         |          |          |         |
|-------------------------|----------|----------|---------|----------|----------|---------|
| Optimization completed. | {Found   | 2        | times}  |          |          |         |
| Item                    | Max Val. | Criteria | Pass?   | RMS Val. | Criteria | Pass?   |
| Force                   | 0.00002  | 0.00045  | [ YES ] | 0.00000  | 0.00030  | [ YES ] |
| Displ                   | 0.00138  | 0.00180  | [ YES ] | 0.00138  | 0.00180  | [ YES ] |

---

| Atomic | Coordinates (Angstroms) |   |   |
|--------|-------------------------|---|---|
| Type   | X                       | Y | Z |

---



|    |           |           |           |
|----|-----------|-----------|-----------|
| C  | -1.483912 | 1.646939  | -0.775880 |
| C  | -1.980081 | -0.359731 | -0.030070 |
| F  | -1.938962 | 1.549719  | -2.012360 |
| F  | -2.307093 | 2.350149  | -0.024820 |
| C  | -0.086142 | 1.670670  | -0.536340 |
| H  | 0.164178  | 2.287720  | 0.324440  |
| C  | 0.864218  | 1.688291  | -1.723060 |
| H  | 0.543337  | 2.515101  | -2.376320 |
| H  | 0.769138  | 0.770801  | -2.311860 |
| C  | 2.338968  | 1.915932  | -1.323920 |
| H  | 2.403777  | 2.828282  | -0.717180 |
| H  | 2.899078  | 2.112432  | -2.244700 |
| C  | 2.970118  | 0.753232  | -0.588310 |
| C  | 3.749469  | -0.186867 | -1.269000 |
| H  | 3.923019  | -0.067647 | -2.335860 |
| C  | 4.303350  | -1.278077 | -0.597240 |
| H  | 4.907120  | -1.995587 | -1.146140 |
| C  | 4.081680  | -1.455467 | 0.770600  |
| H  | 4.510980  | -2.308537 | 1.287890  |
| C  | 3.313469  | -0.524958 | 1.466970  |
| H  | 3.145619  | -0.632908 | 2.534590  |
| C  | 2.764789  | 0.577852  | 0.794510  |
| H  | 2.249238  | 1.338562  | 1.372760  |
| C  | -2.856911 | -0.220591 | 1.060590  |
| H  | -2.559201 | 0.346649  | 1.933980  |
| C  | -4.108111 | -0.832442 | 1.001390  |
| H  | -4.785731 | -0.736143 | 1.844840  |
| C  | -4.488890 | -1.555812 | -0.132700 |
| H  | -5.467610 | -2.025543 | -0.171860 |
| C  | -3.619910 | -1.665992 | -1.222450 |
| H  | -3.916250 | -2.221372 | -2.107560 |
| C  | -2.361580 | -1.069661 | -1.182020 |
| H  | -1.689770 | -1.158411 | -2.025740 |
| Pd | 0.045679  | -0.240630 | 0.465200  |
| Cl | -0.141852 | 0.945600  | 2.661370  |
| Cl | 0.648510  | -2.104609 | -0.967510 |

---

Statistical Thermodynamic Analysis

Temperature= 393.150 Kelvin    Pressure= 1.00000 Atm

---

SCF Energy= -1865.53392473    Predicted Change= -1.451323D-08

Zero-point correction (ZPE)= -1865.2649    0.26894

Internal Energy (U)= -1865.2308    0.30306

Enthalpy (H)= -1865.2296    0.30430

Gibbs Free Energy (G)= -1865.3423    0.19156

Entropy (S)= 0.00028677

---

Frequencies -- -460.8400                    32.9938                    43.5314

## Ar Radical II Addition

Using Gaussian 16: ES64L-G16RevA.03 25-Dec-2016

```
# b3lyp/6-31G(d) gfpri nt gfi nput scf=(direct,tight,maxcycle=300,xqc)
opt=(maxcycle=250,ts,calcf, noeigentest) freq=norman
SCRF=(PCM,SOLVENT=1,4-dioxane) iop(1/8=18) Temperature=393.15
#N Geom=AllCheck Guess=TCheck SCRF=Check Test GenChk UB3LYP/6-31G(d) Freq
```

```
Pointgroup= C1 Stoichiometry= C16H15F2(2) C1[X(C16H15F2)] #Atoms= 33
Charge = 0 Multiplicity = 2
```

```
SCF Energy= -818.299953351 Predicted Change= -1.113207D-09
```

```
Optimization completed on the basis of negligible forces. {Found 2 times}
Item Max Val. Criteria Pass? RMS Val. Criteria Pass?
Force 0.00000 || 0.00045 [ YES ] 0.00000 || 0.00030 [ YES ]
Displ 0.00208 || 0.00180 [ NO ] 0.00208 || 0.00180 [ YES ]
```

```
Atomic Coordinates (Angstroms)
Type X Y Z
```

|   |           |           |           |
|---|-----------|-----------|-----------|
| C | 1.015134  | -1.653396 | 0.501874  |
| C | 2.640008  | 0.024779  | 0.187395  |
| F | 1.633689  | -2.513191 | -0.313342 |
| F | 1.372818  | -1.875242 | 1.768530  |
| C | -0.097661 | -0.974461 | 0.161882  |
| H | -0.574233 | -0.404419 | 0.952299  |
| C | -0.598906 | -0.846574 | -1.245162 |
| H | -0.034345 | -1.515772 | -1.902765 |
| H | -0.421295 | 0.176950  | -1.607041 |
| C | -2.111194 | -1.162792 | -1.387591 |
| H | -2.291988 | -2.191515 | -1.054934 |
| H | -2.358003 | -1.125889 | -2.456258 |
| C | -3.011582 | -0.211077 | -0.627328 |
| C | -3.276238 | 1.072752  | -1.127757 |
| H | -2.847073 | 1.373198  | -2.081641 |
| C | -4.086297 | 1.964839  | -0.425045 |
| H | -4.281913 | 2.953130  | -0.833151 |
| C | -4.649940 | 1.587442  | 0.796531  |
| H | -5.283727 | 2.280132  | 1.343714  |
| C | -4.397510 | 0.312841  | 1.305671  |
| H | -4.834835 | 0.007112  | 2.252669  |
| C | -3.585657 | -0.576739 | 0.597773  |
| H | -3.398302 | -1.570593 | 0.998369  |
| C | 3.297261  | 0.069585  | -1.026795 |
| H | 3.091278  | -0.649682 | -1.815649 |
| C | 4.262885  | 1.072598  | -1.203769 |
| H | 4.807685  | 1.137849  | -2.143063 |

|   |          |          |           |
|---|----------|----------|-----------|
| C | 4.525463 | 1.982861 | -0.175970 |
| H | 5.273222 | 2.758200 | -0.319588 |
| C | 3.832732 | 1.902001 | 1.035835  |
| H | 4.043257 | 2.611442 | 1.833097  |
| C | 2.863406 | 0.906018 | 1.227564  |
| H | 2.320281 | 0.831684 | 2.166610  |

---

Statistical Thermodynamic Analysis

Temperature= 393.150 Kelvin    Pressure= 1.00000 Atm

---

SCF Energy= -818.299953351    Predicted Change= -1.113207D-09

Zero-point correction (ZPE)= -818.0368    0.26307

Internal Energy (U)= -818.0096    0.29028

Enthalpy (H)= -818.0084    0.29152

Gibbs Free Energy (G)= -818.1100    0.18994

Entropy (S)= 0.00025839

---

Frequencies -- -392.4678            10.9980            14.9899

**Ar Radical P-Pd Addition**

-----  
Using Gaussian 16: ES64L-G16RevA.03 25-Dec-2016  
=====

```
# b3lyp/gen pseudo=read 6D 10F gfprint gfinput
scf=(direct,tight,maxcycle=300,xqc)
opt=(maxcycle=250,ts,calcfc,noeigentest) freq=noraman
SCRF=(PCM,SOLVENT=1,4-dioxane) iop(1/8=18) Temperature=393.15
#N Geom=AllCheck Guess=TCheck SCRF=Check Test GenChk UB3LYP/ChkBas Freq
```

-----  
Pointgroup= C1 Stoichiometry= C16H15Cl2F2Pd(2) C1[X(C16H15Cl2F2Pd)] #Atoms= 36  
Charge = 0 Multiplicity = 2  
-----

SCF Energy= -1865.50819624 Predicted Change= -1.571888D-09  
=====

```
Optimization completed.      {Found      2      times}
Item  Max Val.  Criteria  Pass?  RMS Val.  Criteria  Pass?
Force  0.00000 || 0.00045 [ YES ]  0.00000 || 0.00030 [ YES ]
Displ  0.00121 || 0.00180 [ YES ]  0.00121 || 0.00180 [ YES ]
```

-----  
Atomic Coordinates (Angstroms)  
Type X Y Z  
-----

|   |           |           |           |
|---|-----------|-----------|-----------|
| C | 1.307771  | -0.625664 | 0.843348  |
| F | 1.794241  | -1.840880 | 0.809498  |
| C | 0.617164  | -0.029564 | -0.222486 |
| H | 0.814525  | -0.533422 | -1.166599 |
| C | 0.409294  | 1.473082  | -0.287909 |
| H | 1.387549  | 1.915737  | -0.521035 |
| H | 0.094383  | 1.857693  | 0.685273  |
| C | -0.584131 | 1.918687  | -1.390953 |
| H | -0.306499 | 1.435602  | -2.335995 |
| H | -0.434356 | 2.994817  | -1.535043 |
| C | -2.042350 | 1.657287  | -1.080414 |
| C | -2.777204 | 2.561138  | -0.303211 |
| H | -2.295842 | 3.463857  | 0.066243  |
| C | -4.115664 | 2.318966  | 0.004845  |
| H | -4.666916 | 3.035229  | 0.607982  |
| C | -4.749202 | 1.161854  | -0.458152 |
| H | -5.792052 | 0.976403  | -0.216932 |
| C | -4.037350 | 0.255341  | -1.241310 |
| H | -4.521390 | -0.637019 | -1.628606 |
| C | -2.692230 | 0.501523  | -1.554668 |
| H | -2.167690 | -0.177611 | -2.220655 |

|    |           |           |           |
|----|-----------|-----------|-----------|
| Pd | -1.195184 | -1.061419 | 0.348455  |
| Cl | -1.674917 | 0.152131  | 2.298031  |
| Cl | -0.859562 | -2.608044 | -1.401641 |
| C  | 3.576096  | 0.232337  | 0.036223  |
| C  | 4.184446  | -0.508611 | -0.949607 |
| C  | 4.086517  | 1.331845  | 0.685783  |
| C  | 5.467774  | -0.079569 | -1.330024 |
| H  | 3.720230  | -1.376096 | -1.409543 |
| C  | 5.371758  | 1.735587  | 0.283578  |
| H  | 3.547438  | 1.859269  | 1.467226  |
| C  | 6.049448  | 1.033354  | -0.716519 |
| H  | 6.002986  | -0.622930 | -2.104464 |
| H  | 5.833073  | 2.596619  | 0.760367  |
| H  | 7.041786  | 1.354843  | -1.018921 |
| F  | 1.469599  | -0.069424 | 2.011833  |

---

Statistical Thermodynamic Analysis

Temperature= 393.150 Kelvin    Pressure= 1.00000 Atm

---

SCF Energy= -1865.50819624    Predicted Change= -1.571888D-09

Zero-point correction (ZPE)= -1865.2410    0.26714

Internal Energy (U)= -1865.2057    0.30242

Enthalpy (H)= -1865.2045    0.30367

Gibbs Free Energy (G)= -1865.3246    0.18357

Entropy (S)= 0.00030547

---

Frequencies -- -268.7850            23.8438            27.5871

*Pd<sup>III</sup> TS Structures Ph & Bn Groups Exchanged*

**β-H Elimination-TS Ph & Bn Groups Exchanged**

---

Using Gaussian 16: ES64L-G16RevA.03 25-Dec-2016

---

# b3lyp/gen pseudo=read 6D 10F gfprint gfinput

scf=(direct,tight,maxcycle=300,xqc)

opt=(maxcycle=250,ts,calcfc,noeigentest) freq=noraman

SCRF=(PCM,SOLVENT=1,4-dioxane) iop(1/8=18) Temperature=393.15

#N Geom=AllCheck Guess=TCheck SCRF=Check Test GenChk UB3LYP/ChkBas Freq

---

Pointgroup= C1    Stoichiometry= C16H15Cl2F2Pd(2)    C1[X(C16H15Cl2F2Pd)]    #Atoms= 36

Charge = 0    Multiplicity = 2

---

SCF Energy= -1865.56896035            Predicted Change= -5.202034D-09

---

Optimization completed. {Found 2 times}  
 Item Max Val. Criteria Pass? RMS Val. Criteria Pass?  
 Force 0.00003 || 0.00045 [ YES ] 0.00000 || 0.00030 [ YES ]  
 Displ 0.00137 || 0.00180 [ YES ] 0.00137 || 0.00180 [ YES ]

---

| Atomic Coordinates (Angstroms) |           |           |           |
|--------------------------------|-----------|-----------|-----------|
| Atomic Type                    | X         | Y         | Z         |
| C                              | -0.883051 | -1.250110 | -1.252840 |
| F                              | -0.950022 | -2.412500 | -0.520790 |
| F                              | -0.081932 | -1.527020 | -2.345910 |
| C                              | -0.211541 | -0.189880 | -0.404650 |
| H                              | -0.718001 | 0.016820  | 0.531860  |
| C                              | 0.559049  | 0.832670  | -1.027080 |
| H                              | 0.712709  | 0.713100  | -2.099910 |
| H                              | 2.039249  | 0.291719  | -0.766640 |
| Pd                             | 1.737649  | -1.014981 | 0.103830  |
| Cl                             | 3.878638  | -1.977602 | 0.088770  |
| Cl                             | 1.162009  | -0.753131 | 2.438160  |
| C                              | -2.281441 | -0.896309 | -1.766480 |
| H                              | -2.170371 | -0.060549 | -2.464860 |
| H                              | -2.608392 | -1.766589 | -2.348250 |
| C                              | -3.280741 | -0.555459 | -0.679890 |
| C                              | -3.818682 | -1.558908 | 0.138710  |
| C                              | -3.679011 | 0.771441  | -0.471810 |
| C                              | -4.731501 | -1.239408 | 1.143810  |
| H                              | -3.519152 | -2.592029 | -0.010760 |
| C                              | -4.593310 | 1.092592  | 0.533520  |
| H                              | -3.276230 | 1.559431  | -1.104400 |
| C                              | -5.120831 | 0.087052  | 1.344690  |
| H                              | -5.139792 | -2.028018 | 1.769670  |
| H                              | -4.893650 | 2.126602  | 0.679310  |
| H                              | -5.833231 | 0.334042  | 2.126880  |
| C                              | 0.743240  | 2.206060  | -0.518680 |
| C                              | 1.164230  | 3.189539  | -1.431920 |
| C                              | 0.495270  | 2.565920  | 0.818310  |
| C                              | 1.308401  | 4.513629  | -1.025410 |
| H                              | 1.371070  | 2.913739  | -2.463010 |
| C                              | 0.649201  | 3.888120  | 1.220250  |
| H                              | 0.215940  | 1.810320  | 1.545470  |
| C                              | 1.051261  | 4.864549  | 0.301460  |
| H                              | 1.626381  | 5.266669  | -1.740000 |
| H                              | 0.463131  | 4.158290  | 2.255210  |
| H                              | 1.171822  | 5.894709  | 0.623830  |

---

Statistical Thermodynamic Analysis

Temperature= 393.150 Kelvin Pressure= 1.00000 Atm

SCF Energy= -1865.56896035 Predicted Change= -5.202034D-09

Zero-point correction (ZPE)= -1865.3036 0.26530  
Internal Energy (U)= -1865.2692 0.29968  
Enthalpy (H)= -1865.2680 0.30093  
Gibbs Free Energy (G)= -1865.3856 0.18332  
Entropy (S)= 0.00029913

---

Frequencies -- -718.0311 17.9589 24.2017

**$\beta$ -F Elimination-TS Ph & Bn Groups Exchanged**

-----  
Using Gaussian 16: ES64L-G16RevA.03 25-Dec-2016  
=====

```
# b3lyp/gen pseudo=read 6D 10F gfprint gfinput
scf=(direct,tight,maxcycle=300,xqc)
opt=(maxcycle=250,ts,calcfc,noeigentest) freq=noraman
SCRF=(PCM,SOLVENT=1,4-dioxane) iop(1/8=18) Temperature=393.15
#N Geom=AllCheck Guess=TCheck SCRF=Check Test GenChk UB3LYP/ChkBas Freq
```

-----  
Pointgroup= C1 Stoichiometry= C16H15Cl2F2Pd(2) C1[X(C16H15Cl2F2Pd)] #Atoms= 36  
Charge = 0 Multiplicity = 2  
-----

SCF Energy= -1865.56246633 Predicted Change= -1.141609D-09  
=====

```
Optimization completed.      {Found      2      times}
Item  Max Val.  Criteria  Pass?  RMS Val.  Criteria  Pass?
Force  0.00000 || 0.00045 [ YES ]  0.00000 || 0.00030 [ YES ]
Displ  0.00061 || 0.00180 [ YES ]  0.00061 || 0.00180 [ YES ]
```

-----  
Atomic Coordinates (Angstroms)  
Type X Y Z  
-----

|    |           |           |           |
|----|-----------|-----------|-----------|
| C  | -1.669120 | -1.173379 | 0.242131  |
| C  | -0.589649 | -0.147291 | -0.074869 |
| H  | -0.419849 | 0.624759  | 0.675551  |
| C  | -0.415149 | 0.320419  | -1.402069 |
| Pd | 1.388940  | -1.079293 | 0.075641  |
| Cl | 1.301270  | -1.148312 | 2.394441  |
| Cl | 1.617787  | -3.411503 | -0.177909 |
| F  | 1.498680  | -0.745053 | -1.874909 |
| F  | -1.016509 | -0.345130 | -2.360509 |
| H  | -1.429631 | -1.631460 | 1.204421  |
| H  | -1.667641 | -1.967289 | -0.508919 |
| C  | -3.028740 | -0.488808 | 0.307081  |
| C  | -3.874770 | -0.457197 | -0.810209 |
| C  | -3.441649 | 0.146302  | 1.487231  |
| C  | -5.110269 | 0.189674  | -0.746659 |
| H  | -3.571140 | -0.951728 | -1.729209 |
| C  | -4.674738 | 0.795754  | 1.550571  |
| H  | -2.798599 | 0.119732  | 2.364111  |
| C  | -5.512218 | 0.819994  | 0.432671  |
| H  | -5.760559 | 0.195495  | -1.617239 |
| H  | -4.984418 | 1.276034  | 2.474771  |



|   |           |          |           |
|---|-----------|----------|-----------|
| H | -6.474668 | 1.321645 | 0.482731  |
| C | 0.144833  | 1.626769 | -1.852089 |
| H | -0.737897 | 2.242230 | -2.090889 |
| H | 0.652822  | 1.439518 | -2.803429 |
| C | 1.038423  | 2.342638 | -0.861699 |
| C | 0.515074  | 3.314288 | -0.000079 |
| C | 2.409463  | 2.044376 | -0.806709 |
| C | 1.344755  | 3.971807 | 0.910301  |
| H | -0.542526 | 3.564379 | -0.044739 |
| C | 3.237814  | 2.705596 | 0.102731  |
| H | 2.816312  | 1.295366 | -1.479309 |
| C | 2.706925  | 3.667516 | 0.964011  |
| H | 0.927446  | 4.724748 | 1.572721  |
| H | 4.297743  | 2.470215 | 0.133001  |
| H | 3.351965  | 4.181565 | 1.670651  |

---

Statistical Thermodynamic Analysis

Temperature= 393.150 Kelvin    Pressure= 1.00000 Atm

---

SCF Energy= -1865.56246633    Predicted Change= -1.141609D-09

Zero-point correction (ZPE)= -1865.2926    0.26984

Internal Energy (U)= -1865.2586    0.30378

Enthalpy (H)= -1865.2574    0.30503

Gibbs Free Energy (G)= -1865.3727    0.18968

Entropy (S)= 0.00029339

---

Frequencies -- -123.8083            22.6551            28.6133

*Pd<sup>II</sup> TS Structures*

**β-H Elimination-TS Pd<sup>II</sup>**

---

Using Gaussian 16: ES64L-G16RevA.03 25-Dec-2016

---

# b3lyp/gen pseudo=read 6D 10F gfprint gfinput

scf=(direct,tight,maxcycle=300,xqc)

opt=(maxcycle=250,ts,calcfc,noeigentest) freq=noraman

SCRF=(PCM,SOLVENT=1,4-dioxane) iop(1/8=18) Temperature=393.15

#N Geom=AllCheck Guess=TCheck SCRF=Check Test GenChk RB3LYP/ChkBas Freq

---

Pointgroup= C1    Stoichiometry= C16H15ClF2Pd    C1[X(C16H15ClF2Pd)]    #Atoms= 35

Charge = 0    Multiplicity = 1

---

SCF Energy= -1405.37821739            Predicted Change= -8.434242D-09

---

Optimization completed on the basis of negligible forces. {Found 2 times}

| Item  | Max Val. | Criteria | Pass?   | RMS Val. | Criteria | Pass?   |
|-------|----------|----------|---------|----------|----------|---------|
| Force | 0.00000  | 0.00045  | [ YES ] | 0.00000  | 0.00030  | [ YES ] |
| Displ | 0.00790  | 0.00180  | [ NO ]  | 0.00790  | 0.00180  | [ NO ]  |

---

| Atomic Type | Coordinates (Angstroms) |           |           |
|-------------|-------------------------|-----------|-----------|
|             | X                       | Y         | Z         |
| C           | 2.008629                | -0.564094 | 0.441287  |
| C           | 3.185396                | 0.347826  | 0.172136  |
| F           | 2.386449                | -1.874164 | 0.225191  |
| F           | 1.629424                | -0.469259 | 1.759261  |
| C           | 0.813042                | -0.280152 | -0.446232 |
| H           | 1.036810                | -0.354976 | -1.510595 |
| C           | -0.248395               | 0.563932  | -0.038177 |
| H           | -0.195402               | 0.953743  | 0.978221  |
| H           | -1.448092               | -0.370434 | 0.391304  |
| C           | -0.989435               | 1.449315  | -1.036954 |
| H           | -0.333213               | 2.314043  | -1.209555 |
| H           | -1.079329               | 0.922394  | -1.992183 |
| Pd          | -0.726342               | -1.693152 | -0.071872 |
| Cl          | -2.147881               | -3.539851 | 0.171867  |
| C           | 3.352314                | 1.522258  | 0.914478  |
| H           | 2.665868                | 1.754721  | 1.722121  |
| C           | 4.414459                | 2.379495  | 0.627686  |
| H           | 4.547193                | 3.285555  | 1.211887  |
| C           | 5.307184                | 2.071247  | -0.401328 |
| H           | 6.133490                | 2.740769  | -0.622820 |
| C           | 5.139507                | 0.899136  | -1.142163 |
| H           | 5.836581                | 0.651322  | -1.937413 |
| H           | 3.957431                | -0.880761 | -1.424320 |
| C           | -2.343275               | 1.928858  | -0.554980 |
| C           | 4.080038                | 0.037804  | -0.859220 |
| C           | -3.505630               | 1.203725  | -0.850671 |
| H           | -3.439615               | 0.302943  | -1.456302 |
| C           | -4.748096               | 1.629690  | -0.377614 |
| H           | -5.639720               | 1.056764  | -0.616175 |
| C           | -4.843925               | 2.788878  | 0.394611  |
| H           | -5.811087               | 3.122163  | 0.760582  |
| C           | -3.692269               | 3.521307  | 0.690242  |
| H           | -3.759872               | 4.428486  | 1.284569  |
| C           | -2.451143               | 3.093043  | 0.217149  |
| H           | -1.558587               | 3.672929  | 0.443476  |

---

#### Statistical Thermodynamic Analysis

Temperature= 393.150 Kelvin      Pressure= 1.00000 Atm

---

SCF Energy= -1405.37821739      Predicted Change= -8.434242D-09  
Zero-point correction (ZPE)= -1405.1140      0.26421

Internal Energy (U)= -1405.0823 0.29586  
Enthalpy (H)= -1405.0811 0.29710  
Gibbs Free Energy (G)= -1405.1922 0.18601  
Entropy (S)= 0.00028257

-----  
Frequencies -- -736.2549 17.3274 21.7784

**$\beta$ -F Elimination-TS Pd<sup>II</sup>**

-----  
Using Gaussian 16: ES64L-G16RevA.03 25-Dec-2016  
=====

```
# b3lyp/gen pseudo=read 6D 10F gfprint gfinput
scf=(direct,tight,maxcycle=300,xqc)
opt=(maxcycle=250,ts,calcfc,noeigentest) freq=noraman
SCRF=(PCM,SOLVENT=1,4-dioxane) iop(1/8=18) Temperature=393.15
#N Geom=AllCheck Guess=TCheck SCRF=Check Test GenChk RB3LYP/ChkBas Freq
```

-----  
Pointgroup= C1 Stoichiometry= C16H15ClF2Pd C1[X(C16H15ClF2Pd)] #Atoms= 35  
Charge = 0 Multiplicity = 1  
-----

SCF Energy= -1405.35860125 Predicted Change= -4.449727D-09  
=====

Optimization completed on the basis of negligible forces. {Found 2 times}  
Item Max Val. Criteria Pass? RMS Val. Criteria Pass?  
Force 0.00000 || 0.00045 [ YES ] 0.00000 || 0.00030 [ YES ]  
Displ 0.00288 || 0.00180 [ NO ] 0.00288 || 0.00180 [ YES ]  
-----

| Atomic<br>Type | Coordinates (Angstroms) |           |           |
|----------------|-------------------------|-----------|-----------|
|                | X                       | Y         | Z         |
| C              | 1.375264                | 0.126852  | 0.192449  |
| C              | 2.244731                | -1.090952 | 0.613442  |
| H              | 1.906870                | -1.973644 | 0.057321  |
| H              | 2.077760                | -1.297869 | 1.677719  |
| C              | 3.716790                | -0.852308 | 0.357457  |
| H              | 1.726744                | 1.010105  | 0.739564  |
| H              | 1.530749                | 0.330849  | -0.871403 |
| C              | -0.105470               | -0.061675 | 0.482564  |
| H              | -0.345355               | -0.194063 | 1.540086  |
| C              | -0.861459               | -0.943971 | -0.365124 |
| F              | -0.244045               | -1.373365 | -1.454444 |
| F              | -1.804976               | 0.525312  | -1.404002 |
| C              | -2.051513               | -1.699318 | -0.010487 |
| Pd             | -1.087647               | 1.733275  | 0.024159  |
| Cl             | -1.900818               | 3.965211  | -0.090658 |
| C              | 4.548936                | -0.343842 | 1.363760  |
| H              | 4.136812                | -0.151885 | 2.352361  |
| C              | 5.898516                | -0.087094 | 1.115575  |
| H              | 6.528708                | 0.303481  | 1.910257  |
| C              | 6.437595                | -0.335185 | -0.148206 |
| H              | 7.488134                | -0.137329 | -0.342946 |

|   |           |           |           |
|---|-----------|-----------|-----------|
| C | 5.619070  | -0.842813 | -1.159696 |
| H | 6.030776  | -1.042661 | -2.145477 |
| C | 4.270894  | -1.098697 | -0.906740 |
| H | 3.640337  | -1.497623 | -1.698732 |
| C | -2.464262 | -2.762096 | -0.837529 |
| H | -1.899873 | -2.999031 | -1.731671 |
| C | -3.589468 | -3.507027 | -0.502732 |
| H | -3.901785 | -4.327655 | -1.140924 |
| C | -4.316958 | -3.196175 | 0.649110  |
| H | -5.197405 | -3.777631 | 0.906736  |
| C | -3.919150 | -2.135002 | 1.470326  |
| H | -4.491768 | -1.888639 | 2.358844  |
| C | -2.793414 | -1.388941 | 1.147177  |
| H | -2.504452 | -0.553712 | 1.776043  |

---

Statistical Thermodynamic Analysis

Temperature= 393.150 Kelvin    Pressure= 1.00000 Atm

---

SCF Energy= -1405.35860125    Predicted Change= -4.449727D-09

Zero-point correction (ZPE)= -1405.0905    0.26808

Internal Energy (U)= -1405.0588    0.29974

Enthalpy (H)= -1405.0576    0.30098

Gibbs Free Energy (G)= -1405.1698    0.18875

Entropy (S)= 0.00028548

---

Frequencies -- -250.2093            19.9208            22.2690

---

**$\beta$ -H Elimination-TS Pd<sup>II</sup> Ph & Bn Groups Exchanged**

---

Using Gaussian 16: ES64L-G16RevA.03 25-Dec-2016

---

# b3lyp/gen pseudo=read 6D 10F gfprint gfinput

scf=(direct,tight,maxcycle=300,xqc)

opt=(maxcycle=250,ts,calcfc,noeigentest) freq=noraman

SCRF=(PCM,SOLVENT=1,4-dioxane) iop(1/8=18) Temperature=393.15

#N Geom=AllCheck Guess=TCheck SCRF=Check Test GenChk RB3LYP/ChkBas Freq

---

Pointgroup= C1    Stoichiometry= C16H15ClF2Pd    C1[X(C16H15ClF2Pd)]    #Atoms= 35

Charge = 0    Multiplicity = 1

---

SCF Energy= -1405.38203890            Predicted Change= -8.702636D-10

---

Optimization completed.            {Found    2    times}

Item    Max Val.    Criteria    Pass?    RMS Val.    Criteria    Pass?

Force    0.00000 || 0.00045 [ YES ]    0.00000 || 0.00030 [ YES ]

Displ 0.00084 || 0.00180 [ YES ] 0.00084 || 0.00180 [ YES ]

---

| Atomic Type | Coordinates (Angstroms) |           |           |
|-------------|-------------------------|-----------|-----------|
|             | X                       | Y         | Z         |
| C           | 0.884420                | -1.221348 | 1.172011  |
| F           | 1.049944                | -2.385314 | 0.447067  |
| F           | 0.167253                | -1.564240 | 2.298352  |
| C           | 0.078086                | -0.255735 | 0.333311  |
| H           | 0.589853                | 0.063165  | -0.572433 |
| C           | -0.856755               | 0.635923  | 0.940236  |
| H           | -0.964399               | 0.529818  | 2.019845  |
| H           | -2.214443               | -0.024047 | 0.744605  |
| Pd          | -1.732018               | -1.162536 | -0.253860 |
| Cl          | -3.528974               | -2.422906 | -1.086818 |
| C           | 2.259696                | -0.722602 | 1.627023  |
| H           | 2.092484                | 0.127062  | 2.297298  |
| H           | 2.683602                | -1.534901 | 2.229544  |
| C           | 3.194787                | -0.335921 | 0.499997  |
| C           | 3.804705                | -1.318488 | -0.293675 |
| C           | 3.465412                | 1.011846  | 0.229594  |
| C           | 4.662383                | -0.959149 | -1.333364 |
| H           | 3.605333                | -2.367430 | -0.095265 |
| C           | 4.324150                | 1.373457  | -0.810602 |
| H           | 3.006123                | 1.784839  | 0.841753  |
| C           | 4.924255                | 0.387907  | -1.595491 |
| H           | 5.128996                | -1.732556 | -1.937333 |
| H           | 4.525509                | 2.423727  | -1.003185 |
| H           | 5.595117                | 0.666387  | -2.403503 |
| C           | -1.133752               | 2.007870  | 0.422182  |
| C           | -1.346737               | 3.035828  | 1.350930  |
| C           | -1.155034               | 2.308279  | -0.948120 |
| C           | -1.549216               | 4.347605  | 0.919739  |
| H           | -1.346550               | 2.810964  | 2.414669  |
| C           | -1.360111               | 3.616873  | -1.376562 |
| H           | -1.034706               | 1.512833  | -1.679145 |
| C           | -1.554337               | 4.640960  | -0.443939 |
| H           | -1.708254               | 5.135596  | 1.650093  |
| H           | -1.379575               | 3.836949  | -2.439893 |
| H           | -1.720186               | 5.659808  | -0.781946 |

---

#### Statistical Thermodynamic Analysis

Temperature= 393.150 Kelvin      Pressure= 1.00000 Atm

---

SCF Energy= -1405.38203890      Predicted Change= -8.702636D-10

Zero-point correction (ZPE)= -1405.1172      0.26474

Internal Energy (U)= -1405.0859      0.29609

Enthalpy (H)= -1405.0846      0.29734

Gibbs Free Energy (G)= -1405.1935      0.18847

Entropy (S)= 0.00027692

-----  
Frequencies -- -704.7131 18.2903 30.1971

### **$\beta$ -F Elimination-TS Pd<sup>II</sup> Ph & Bn Groups Exchanged**

-----  
Using Gaussian 16: ES64L-G16RevA.03 25-Dec-2016  
=====

```
# b3lyp/gen pseudo=read 6D 10F gfprint ginput
scf=(direct,tight,maxcycle=300,xqc)
opt=(maxcycle=250,ts,calcfc,noeigentest) freq=noraman
SCRF=(PCM,SOLVENT=1,4-dioxane) iop(1/8=18) Temperature=393.15
#N Geom=AllCheck Guess=TCheck SCRF=Check Test GenChk RB3LYP/ChkBas Freq
```

-----  
Pointgroup= C1 Stoichiometry= C16H15ClF2Pd C1[X(C16H15ClF2Pd)] #Atoms= 35  
Charge = 0 Multiplicity = 1  
-----

SCF Energy= -1405.35728925 Predicted Change= -1.849721D-10  
=====

```
Optimization completed. {Found 2 times}
Item Max Val. Criteria Pass? RMS Val. Criteria Pass?
Force 0.00000 || 0.00045 [ YES ] 0.00000 || 0.00030 [ YES ]
Displ 0.00037 || 0.00180 [ YES ] 0.00037 || 0.00180 [ YES ]
```

-----  
Atomic Coordinates (Angstroms)  
Type X Y Z  
-----

|    |           |           |           |
|----|-----------|-----------|-----------|
| C  | 1.621887  | -1.415110 | -0.194212 |
| C  | 0.528033  | -0.375517 | 0.047346  |
| H  | 0.469484  | 0.426623  | -0.691657 |
| C  | 0.274390  | 0.095138  | 1.364571  |
| Pd | -1.344805 | -1.324007 | -0.244029 |
| Cl | -3.266906 | -2.527463 | -0.923267 |
| F  | -1.535453 | -0.777737 | 1.683219  |
| F  | 0.827386  | -0.566577 | 2.364782  |
| H  | 1.383265  | -1.960220 | -1.116138 |
| H  | 1.622804  | -2.148835 | 0.616995  |
| C  | 2.997633  | -0.777200 | -0.340111 |
| C  | 3.777214  | -0.486291 | 0.788352  |
| C  | 3.496285  | -0.446865 | -1.606513 |
| C  | 5.027817  | 0.118004  | 0.651704  |
| H  | 3.406959  | -0.741626 | 1.778013  |
| C  | 4.745873  | 0.160024  | -1.745417 |
| H  | 2.906152  | -0.674520 | -2.491689 |
| C  | 5.515333  | 0.444439  | -0.615800 |
| H  | 5.623905  | 0.328076  | 1.535778  |
| H  | 5.119714  | 0.403831  | -2.736218 |
| H  | 6.490241  | 0.912038  | -0.722344 |
| C  | -0.182967 | 1.460172  | 1.765630  |

|   |           |          |           |
|---|-----------|----------|-----------|
| H | 0.744435  | 1.991459 | 2.031644  |
| H | -0.748297 | 1.342003 | 2.696049  |
| C | -0.956356 | 2.243599 | 0.727142  |
| C | -0.324751 | 3.242454 | -0.023858 |
| C | -2.318855 | 1.987052 | 0.515229  |
| C | -1.039271 | 3.971236 | -0.977332 |
| H | 0.728803  | 3.457465 | 0.140797  |
| C | -3.032468 | 2.717452 | -0.435697 |
| H | -2.810115 | 1.212835 | 1.095582  |
| C | -2.394516 | 3.709245 | -1.185009 |
| H | -0.537620 | 4.745209 | -1.551557 |
| H | -4.087768 | 2.510694 | -0.589045 |
| H | -2.952639 | 4.277998 | -1.923511 |

---

Statistical Thermodynamic Analysis

Temperature= 393.150 Kelvin    Pressure= 1.00000 Atm

---

SCF Energy= -1405.35728925    Predicted Change= -1.849721D-10  
Zero-point correction (ZPE)= -1405.0888    0.26844  
Internal Energy (U)= -1405.0576    0.29964  
Enthalpy (H)= -1405.0564    0.30088  
Gibbs Free Energy (G)= -1405.1646    0.19261  
Entropy (S)= 0.00027539

---

Frequencies -- -275.8297            22.4393            24.4458

*Model System Structures*

**H anion**

---

Using Gaussian 16: ES64L-G16RevA.03 25-Dec-2016

---

```
# b3lyp/6-31G(d) gfpri nt gfinpu t scf=(direct,tight,maxcycle=300,xqc)
opt=(maxcycle=250) freq=noraman SCRF=(PCM,SOLVENT=1,4-dioxane) iop(1/8=18)
Temperature=393.15
#N Geom=AllCheck Guess=TCheck SCRF=Check Test GenChk RB3LYP/6-31G(d) Freq
```

---

Pointgroup= OH    Stoichiometry= H(1-)    OH[O(H)]    #Atoms= 1  
Charge = -1    Multiplicity = 1

---

SCF Energy= -0.549083240314    Predicted Change= -0.000000D+00

---

Optimization completed.    {Found    2    times}  
Item    Max Val.    Criteria    Pass?    RMS Val.    Criteria    Pass?  
Force    0.00000 || 0.00045    [ YES ]    0.00000 || 0.00030    [ YES ]  
Displ    0.00000 || 0.00180    [ YES ]    0.00000 || 0.00180    [ YES ]

---

Atomic    Coordinates (Angstroms)  
Type    X            Y            Z



H 0.000000 0.000000 0.000000

Statistical Thermodynamic Analysis

Temperature= 393.150 Kelvin Pressure= 1.00000 Atm

SCF Energy= -0.549083240314 Predicted Change= -0.000000D+00  
Zero-point correction (ZPE)= -0.5490 0.00000  
Internal Energy (U)= -0.5472 0.00186  
Enthalpy (H)= -0.5459 0.00311  
Gibbs Free Energy (G)= -0.5631 -0.01404  
Entropy (S)= 4.365e-05

**F anion**

Using Gaussian 16: ES64L-G16RevA.03 25-Dec-2016

# b3lyp/6-31G(d) gfpri nt gfinpu t scf=(direct,tight,maxcycle=300,xqc)  
opt=(maxcycle=250) freq=noraman SCRF=(PCM,SOLVENT=1,4-dioxane) iop(1/8=18)  
Temperature=393.15  
#N Geom=AllCheck Guess=TCheck SCRF=Check Test GenChk RB3LYP/6-31G(d) Freq

Pointgroup= OH Stoichiometry= F(1-) OH[O(F)] #Atoms= 1  
Charge = -1 Multiplicity = 1

SCF Energy= -99.8323175207 Predicted Change= -0.000000D+00

Optimization completed. {Found 2 times}  
Item Max Val. Criteria Pass? RMS Val. Criteria Pass?  
Force 0.00000 || 0.00045 [ YES ] 0.00000 || 0.00030 [ YES ]  
Displ 0.00000 || 0.00180 [ YES ] 0.00000 || 0.00180 [ YES ]

Atomic Coordinates (Angstroms)  
Type X Y Z

F 0.000000 0.000000 0.000000

Statistical Thermodynamic Analysis

Temperature= 393.150 Kelvin Pressure= 1.00000 Atm

SCF Energy= -99.8323175207 Predicted Change= -0.000000D+00  
Zero-point correction (ZPE)= -99.8323 0.00000  
Internal Energy (U)= -99.8304 0.00186  
Enthalpy (H)= -99.8292 0.00311  
Gibbs Free Energy (G)= -99.8518 -0.01953  
Entropy (S)= 5.76e-05

## PdCl<sub>2</sub>H

Using Gaussian 16: ES64L-G16RevA.03 25-Dec-2016

```
# b3lyp/gen pseudo=read 6D 10F gfprint ginput
scf=(direct,tight,maxcycle=300,xqc) opt=(maxcycle=250) freq=noraman
SCRF=(PCM,SOLVENT=1,4-dioxane) iop(1/8=18) Temperature=393.15
#N Geom=AllCheck Guess=TCheck SCRf=Check Test GenChk UB3LYP/ChkBas Freq
```

```
Pointgroup= C1  Stoichiometry= Cl2HPd(2)  C1[X(Cl2HPd)]  #Atoms= 4
Charge = 0  Multiplicity = 2
```

```
SCF Energy= -1047.75206429  Predicted Change= -6.017181D-09
```

```
Optimization completed.      {Found 2 times}
Item  Max Val.  Criteria  Pass?  RMS Val.  Criteria  Pass?
Force  0.00002 || 0.00045 [ YES ]  0.00001 || 0.00030 [ YES ]
Displ  0.00072 || 0.00180 [ YES ]  0.00072 || 0.00180 [ YES ]
```

```
Atomic      Coordinates (Angstroms)
Type        X          Y          Z
```

```
Cl  2.274951  0.014900  0.000271
H   0.000017  1.469357 -0.000353
Pd -0.000001 -0.042956 -0.000193
Cl -2.274950  0.014901  0.000271
```

Statistical Thermodynamic Analysis

```
Temperature= 393.150 Kelvin  Pressure= 1.00000 Atm
```

```
SCF Energy= -1047.75206429  Predicted Change= -6.017181D-09
Zero-point correction (ZPE)= -1047.7436  0.00842
Internal Energy (U)= -1047.7362  0.01578
Enthalpy (H)= -1047.7350  0.01703
Gibbs Free Energy (G)= -1047.7858  -0.03382
Entropy (S)= 0.00012935
```

```
Frequencies -- 79.5882 132.8921 308.6133
```

## PdCl<sub>2</sub>F

Using Gaussian 16: ES64L-G16RevA.03 25-Dec-2016

```
# b3lyp/gen pseudo=read 6D 10F gfprint ginput
scf=(direct,tight,maxcycle=300,xqc) opt=(maxcycle=250,gdiis,maxstep=10)
freq=noraman SCRf=(PCM,SOLVENT=1,4-dioxane) iop(1/8=18) Temperature=393.15
#N Geom=AllCheck Guess=TCheck SCRf=Check Test GenChk UB3LYP/ChkBas Freq
```

```
Pointgroup= C1  Stoichiometry= Cl2FPd(2)  C1[X(Cl2FPd)]  #Atoms= 4
```

Charge = 0 Multiplicity = 2

SCF Energy= -1146.95252501 Predicted Change= -6.151696D-09

Optimization completed. {Found 2 times}  
Item Max Val. Criteria Pass? RMS Val. Criteria Pass?  
Force 0.00002 || 0.00045 [ YES ] 0.00001 || 0.00030 [ YES ]  
Displ 0.00029 || 0.00180 [ YES ] 0.00029 || 0.00180 [ YES ]

Atomic Coordinates (Angstroms)  
Type X Y Z

Cl 2.259942 -0.303887 0.133528  
Pd 0.000021 -0.118750 -0.108442  
Cl -2.259988 -0.303892 0.133518  
F -0.000021 1.754970 0.049838

Statistical Thermodynamic Analysis

Temperature= 393.150 Kelvin Pressure= 1.00000 Atm

SCF Energy= -1146.95252501 Predicted Change= -6.151696D-09  
Zero-point correction (ZPE)= -1146.9486 0.00391  
Internal Energy (U)= -1146.9404 0.01209  
Enthalpy (H)= -1146.9391 0.01334  
Gibbs Free Energy (G)= -1146.9938 -0.04133  
Entropy (S)= 0.00013907

Frequencies -- 95.4056 149.7922 170.0046

### CH<sub>2</sub>CF<sub>2</sub>Bn anion

Using Gaussian 16: ES64L-G16RevA.03 25-Dec-2016

# b3lyp/6-31G(d) gffprint gffinput scf=(direct,tight,maxcycle=300,xqc)  
opt=(maxcycle=250) freq=noraman SCRF=(PCM,SOLVENT=1,4-dioxane) iop(1/8=18)  
Temperature=393.15  
#N Geom=AllCheck Guess=TCheck SCRF=Check Test GenChk RB3LYP/6-31G(d) Freq

Pointgroup= C1 Stoichiometry= C9H9F2(1-) C1[X(C9H9F2)] #Atoms= 20  
Charge = -1 Multiplicity = 1

SCF Energy= -548.064923671 Predicted Change= -2.146595D-08

Optimization completed. {Found 2 times}  
Item Max Val. Criteria Pass? RMS Val. Criteria Pass?  
Force 0.00003 || 0.00045 [ YES ] 0.00000 || 0.00030 [ YES ]  
Displ 0.00122 || 0.00180 [ YES ] 0.00122 || 0.00180 [ YES ]

Atomic Coordinates (Angstroms)

| Type | X         | Y         | Z         |
|------|-----------|-----------|-----------|
| C    | -1.951840 | 0.139935  | 0.038159  |
| F    | -1.733888 | -0.068845 | 1.412495  |
| F    | -3.139440 | -0.868832 | -0.133675 |
| C    | -2.200270 | 1.495972  | -0.285091 |
| H    | -2.326131 | 1.667337  | -1.358685 |
| H    | -2.997025 | 1.958232  | 0.307561  |
| C    | -0.863994 | -0.606221 | -0.743698 |
| H    | -1.027333 | -1.680275 | -0.609584 |
| C    | 0.574026  | -0.279058 | -0.378406 |
| H    | -1.033447 | -0.390802 | -1.807472 |
| C    | 1.498390  | -1.309378 | -0.158915 |
| H    | 1.165276  | -2.344009 | -0.225356 |
| C    | 2.834665  | -1.034946 | 0.146927  |
| H    | 3.530679  | -1.854194 | 0.317097  |
| C    | 3.271089  | 0.287339  | 0.242694  |
| H    | 4.309530  | 0.507472  | 0.482219  |
| C    | 2.357622  | 1.324750  | 0.030352  |
| H    | 2.686343  | 2.359599  | 0.109492  |
| C    | 1.026013  | 1.046106  | -0.278845 |
| H    | 0.277854  | 1.828741  | -0.403707 |

---

Statistical Thermodynamic Analysis

Temperature= 393.150 Kelvin    Pressure= 1.00000 Atm

---

SCF Energy= -548.064923671    Predicted Change= -2.146595D-08  
Zero-point correction (ZPE)= -547.9107    0.15413  
Internal Energy (U)= -547.8943    0.17062  
Enthalpy (H)= -547.8930    0.17186  
Gibbs Free Energy (G)= -547.9613    0.10354  
Entropy (S)= 0.00017379

---

Frequencies --    71.0056                    107.4349                    133.5342

**CH<sub>2</sub>CF<sub>2</sub>Ph anion**

---

Using Gaussian 16: ES64L-G16RevA.03 25-Dec-2016

---

# b3lyp/6-31G(d) gfpint gfinput scf=(direct,tight,maxcycle=300,xqc)  
opt=(maxcycle=250) freq=noraman SCRF=(PCM,SOLVENT=1,4-dioxane) iop(1/8=18)  
Temperature=393.15  
#N Geom=AllCheck Guess=TCheck SCRF=Check Test GenChk RB3LYP/6-31G(d) Freq

---

Pointgroup= C1    Stoichiometry= C8H7F2(1-)    C1[X(C8H7F2)]    #Atoms= 17  
Charge = -1    Multiplicity = 1

---

SCF Energy= -508.751848058                    Predicted Change= -4.063829D-10

---

Optimization completed. {Found 2 times}

| Item  | Max Val. | Criteria | Pass?   | RMS Val. | Criteria | Pass?   |
|-------|----------|----------|---------|----------|----------|---------|
| Force | 0.00000  | 0.00045  | [ YES ] | 0.00000  | 0.00030  | [ YES ] |
| Displ | 0.00011  | 0.00180  | [ YES ] | 0.00011  | 0.00180  | [ YES ] |

---

| Atomic Type | Coordinates (Angstroms) |           |           |
|-------------|-------------------------|-----------|-----------|
|             | X                       | Y         | Z         |
| C           | -2.088982               | 1.321993  | -0.536456 |
| H           | -3.182199               | 1.317123  | -0.554260 |
| H           | -1.637070               | 1.704391  | -1.453313 |
| C           | -1.497646               | 0.153477  | -0.021536 |
| F           | -1.943973               | -0.167566 | 1.296716  |
| C           | 0.015330                | 0.074825  | -0.046140 |
| F           | -1.926887               | -1.211570 | -0.651502 |
| C           | 0.786583                | 1.244248  | 0.034948  |
| H           | 0.257485                | 2.190511  | 0.089568  |
| C           | 2.181375                | 1.190407  | 0.048076  |
| H           | 2.756585                | 2.113388  | 0.098943  |
| C           | 2.839092                | -0.041938 | 0.012601  |
| H           | 3.926212                | -0.087383 | 0.035494  |
| C           | 2.082240                | -1.215787 | -0.046413 |
| H           | 2.582401                | -2.182553 | -0.074448 |
| C           | 0.688455                | -1.157487 | -0.078725 |
| H           | 0.095649                | -2.061671 | -0.147039 |

---

#### Statistical Thermodynamic Analysis

Temperature= 393.150 Kelvin    Pressure= 1.00000 Atm

---

SCF Energy= -508.751848058    Predicted Change= -4.063829D-10  
Zero-point correction (ZPE)= -508.6264    0.12541  
Internal Energy (U)= -508.6118    0.13997  
Enthalpy (H)= -508.6106    0.14121  
Gibbs Free Energy (G)= -508.6743    0.07745  
Entropy (S)= 0.00016219

---

Frequencies --    83.9154                    129.6057                    214.6674

#### CH<sub>2</sub>CH<sub>2</sub>Bn anion

Using Gaussian 16: ES64L-G16RevA.03 25-Dec-2016

---

```
# b3lyp/6-31G(d) gfpint ginput scf=(direct,tight,maxcycle=300,xqc)
opt=(maxcycle=250) freq=noraman SCRF=(PCM,SOLVENT=1,4-dioxane) iop(1/8=18)
Temperature=393.15
#N Geom=AllCheck Guess=TChech SCRF=Check Test GenChk RB3LYP/6-31G(d) Freq
```

---

Pointgroup= C1    Stoichiometry= C9H11(1-)    C1[X(C9H11)]    #Atoms= 20  
Charge = -1    Multiplicity = 1

-----  
SCF Energy= -349.546064021      Predicted Change= -1.141720D-08  
=====

Optimization completed.      {Found      2      times}  
Item    Max Val.    Criteria    Pass?    RMS Val.    Criteria    Pass?  
Force    0.00002 || 0.00045 [ YES ]    0.00000 || 0.00030 [ YES ]  
Displ    0.00139 || 0.00180 [ YES ]    0.00139 || 0.00180 [ YES ]  
-----

Atomic      Coordinates (Angstroms)  
Type    X      Y      Z  
-----

|   |           |           |           |
|---|-----------|-----------|-----------|
| C | 2.329136  | -0.000489 | -0.597379 |
| H | 1.972196  | 0.876880  | -1.168973 |
| H | 1.972794  | -0.879017 | -1.167598 |
| C | 3.819359  | 0.000159  | -0.448987 |
| H | 4.135407  | -0.884710 | 0.145572  |
| H | 4.134912  | 0.886547  | 0.143572  |
| C | 1.409341  | 0.000103  | 0.741329  |
| H | 1.697253  | -0.884810 | 1.322937  |
| C | -0.055838 | 0.000063  | 0.459687  |
| H | 1.697249  | 0.885433  | 1.322291  |
| C | -0.763520 | 1.202849  | 0.241509  |
| H | -0.247262 | 2.149265  | 0.395660  |
| C | -2.099960 | 1.205160  | -0.152867 |
| H | -2.615753 | 2.152779  | -0.300902 |
| C | -2.784433 | -0.000026 | -0.353512 |
| H | -3.828071 | -0.000017 | -0.659418 |
| C | -2.099933 | -1.205138 | -0.152779 |
| H | -2.615643 | -2.152806 | -0.300769 |
| C | -0.763465 | -1.202748 | 0.241622  |
| H | -0.247200 | -2.149139 | 0.395893  |

-----

Statistical Thermodynamic Analysis

Temperature= 393.150 Kelvin      Pressure= 1.00000 Atm  
=====

SCF Energy=    -349.546064021    Predicted Change= -1.141720D-08  
Zero-point correction (ZPE)=      -349.3775    0.16850  
Internal Energy (U)=      -349.3630    0.18296  
Enthalpy (H)=      -349.3618    0.18421  
Gibbs Free Energy (G)=      -349.4257    0.12033  
Entropy (S)=      0.00016247  
-----

Frequencies --    70.7824                  96.2996                  111.5091  
-----

**CH<sub>2</sub>CH<sub>2</sub>Ph anion**  
-----

Using Gaussian 16: ES64L-G16RevA.03 25-Dec-2016  
=====

# b3lyp/6-31G(d) gfp rint gfinput scf=(direct,tight,maxcycle=300,xqc)

opt=(maxcycle=250) freq=noraman SCRF=(PCM,SOLVENT=1,4-dioxane) iop(1/8=18)  
Temperature=393.15  
#N Geom=AllCheck Guess=TCheck SCRF=Check Test GenChk RB3LYP/6-31G(d) Freq

Pointgroup= C1 Stoichiometry= C8H9(1-) C1[X(C8H9)] #Atoms= 17  
Charge = -1 Multiplicity = 1

SCF Energy= -310.234819954 Predicted Change= -3.591343D-09

Optimization completed. {Found 2 times}  
Item Max Val. Criteria Pass? RMS Val. Criteria Pass?  
Force 0.00001 || 0.00045 [ YES ] 0.00000 || 0.00030 [ YES ]  
Displ 0.00037 || 0.00180 [ YES ] 0.00037 || 0.00180 [ YES ]

| Atomic Type | Coordinates (Angstroms) |           |           |
|-------------|-------------------------|-----------|-----------|
|             | X                       | Y         | Z         |
| C           | 2.831249                | -0.000017 | 0.769099  |
| H           | 2.489471                | 0.877191  | 1.363376  |
| H           | 2.489143                | -0.877009 | 1.363512  |
| C           | 2.025551                | -0.000021 | -0.545419 |
| H           | 2.286839                | 0.882044  | -1.158846 |
| C           | 0.525554                | -0.000013 | -0.337058 |
| H           | 2.286755                | -0.882110 | -1.158864 |
| C           | -0.206934               | -1.200866 | -0.198034 |
| H           | 0.319972                | -2.147799 | -0.317811 |
| C           | -1.570202               | -1.204407 | 0.087164  |
| H           | -2.098726               | -2.153367 | 0.178282  |
| C           | -2.271174               | -0.000005 | 0.237062  |
| H           | -3.336287               | 0.000027  | 0.458381  |
| C           | -1.570179               | 1.204431  | 0.087128  |
| H           | -2.098741               | 2.153374  | 0.178175  |
| C           | -0.206934               | 1.200872  | -0.198017 |
| H           | 0.319995                | 2.147799  | -0.317754 |

Statistical Thermodynamic Analysis  
Temperature= 393.150 Kelvin Pressure= 1.00000 Atm

SCF Energy= -310.234819954 Predicted Change= -3.591343D-09  
Zero-point correction (ZPE)= -310.0946 0.14013  
Internal Energy (U)= -310.0824 0.15236  
Enthalpy (H)= -310.0812 0.15361  
Gibbs Free Energy (G)= -310.1394 0.09540  
Entropy (S)= 0.00014806

Frequencies -- 93.9152 140.4683 275.9692

**CH<sub>2</sub>CFBn + F anion**

Using Gaussian 16: ES64L-G16RevA.03 25-Dec-2016

---

---

# b3lyp/6-31G(d) gfpint gfinput scf=(direct,tight,maxcycle=300,xqc)  
opt=(maxcycle=250) freq=noraman SCRF=(PCM,SOLVENT=1,4-dioxane) iop(1/8=18)  
Temperature=393.15  
#N Geom=AllCheck Guess=TCheck SCRF=Check Test GenChk RB3LYP/6-31G(d) Freq

---

Pointgroup= C1 Stoichiometry= C9H9F C1[X(C9H9F)] #Atoms= 19  
Charge = 0 Multiplicity = 1

---

SCF Energy= -448.195540829 Predicted Change= -2.368700D-09

---

---

Optimization completed. {Found 2 times}  
Item Max Val. Criteria Pass? RMS Val. Criteria Pass?  
Force 0.00002 || 0.00045 [ YES ] 0.00000 || 0.00030 [ YES ]  
Displ 0.00095 || 0.00180 [ YES ] 0.00095 || 0.00180 [ YES ]

---

| Atomic Type | Coordinates (Angstroms) |           |           |
|-------------|-------------------------|-----------|-----------|
|             | X                       | Y         | Z         |
| C           | 2.187466                | 0.000191  | -0.049878 |
| F           | 2.098783                | -1.288515 | -0.476275 |
| C           | 3.109964                | 0.800403  | -0.572632 |
| H           | 3.191802                | 1.829266  | -0.243220 |
| H           | 3.795210                | 0.444027  | -1.333784 |
| C           | 1.165457                | 0.311920  | 1.005430  |
| H           | 1.326761                | -0.371899 | 1.850141  |
| C           | -0.265466               | 0.174701  | 0.507125  |
| H           | 1.345343                | 1.326970  | 1.372166  |
| C           | -0.868758               | -1.085700 | 0.406100  |
| H           | -0.309355               | -1.970760 | 0.696933  |
| C           | -2.175462               | -1.213113 | -0.066444 |
| H           | -2.629608               | -2.198078 | -0.136502 |
| C           | -2.898531               | -0.079857 | -0.445495 |
| H           | -3.917500               | -0.178306 | -0.810088 |
| C           | -2.305636               | 1.180341  | -0.349720 |
| H           | -2.860988               | 2.068428  | -0.639893 |
| C           | -0.997338               | 1.304134  | 0.121660  |
| H           | -0.540897               | 2.288874  | 0.193856  |

---

Statistical Thermodynamic Analysis

Temperature= 393.150 Kelvin Pressure= 1.00000 Atm

---

---

SCF Energy= -448.195540829 Predicted Change= -2.368700D-09  
Zero-point correction (ZPE)= -448.0410 0.15445  
Internal Energy (U)= -448.0265 0.16904  
Enthalpy (H)= -448.0252 0.17028  
Gibbs Free Energy (G)= -448.0914 0.10412  
Entropy (S)= 0.00016829



-----  
Frequencies -- 27.6676            69.9360            96.6620  
-----

**CH<sub>2</sub>CFPh + F anion**

-----  
Using Gaussian 16: ES64L-G16RevA.03 25-Dec-2016  
-----

# b3lyp/6-31G(d) gfpri n gfinpu t scf=(direct,verytight,maxcycle=300,xqc)  
opt=(maxcycle=250) freq=noraman SCRF=(PCM,SOLVENT=1,4-dioxane) iop(1/8=18)  
Temperature=393.15  
#N Geom=AllCheck Guess=TCheck SCRF=Check Test GenChk RB3LYP/6-31G(d) Freq

-----  
Pointgroup= C1 Stoichiometry= C8H7F C1[X(C8H7F)] #Atoms= 16  
Charge = 0 Multiplicity = 1  
-----

SCF Energy= -408.885223133      Predicted Change= -1.196023D-10  
-----

Optimization completed.      {Found    2    times}  
Item    Max Val.    Criteria    Pass?    RMS Val.    Criteria    Pass?  
Force    0.00000 || 0.00045 [ YES ]    0.00000 || 0.00030 [ YES ]  
Displ    0.00016 || 0.00180 [ YES ]    0.00016 || 0.00180 [ YES ]  
-----

| Atomic Coordinates (Angstroms) |           |           |           |
|--------------------------------|-----------|-----------|-----------|
| Type                           | X         | Y         | Z         |
| C                              | -1.694183 | 0.058297  | 0.000574  |
| C                              | -0.221781 | 0.050513  | -0.001300 |
| F                              | -2.226472 | -1.194962 | -0.037851 |
| C                              | -2.539506 | 1.089560  | 0.036994  |
| H                              | -2.184581 | 2.111198  | 0.075387  |
| H                              | -3.609429 | 0.918371  | 0.030965  |
| C                              | 0.520333  | 1.245080  | -0.020179 |
| H                              | 0.010617  | 2.203384  | -0.041096 |
| C                              | 1.911450  | 1.213511  | -0.016975 |
| H                              | 2.468630  | 2.146185  | -0.032297 |
| C                              | 2.590263  | -0.008884 | 0.003467  |
| H                              | 3.676501  | -0.030264 | 0.005210  |
| C                              | 1.862924  | -1.199037 | 0.019887  |
| H                              | 2.380206  | -2.154466 | 0.034830  |
| C                              | 0.468482  | -1.172334 | 0.017129  |
| H                              | -0.091593 | -2.099989 | 0.030082  |

-----  
Statistical Thermodynamic Analysis  
Temperature= 393.150 Kelvin      Pressure= 1.00000 Atm  
-----

SCF Energy= -408.885223133      Predicted Change= -1.196023D-10  
Zero-point correction (ZPE)=      -408.7593    0.12588  
Internal Energy (U)=              -408.7469    0.13830  
Enthalpy (H)=                      -408.7456    0.13954  
-----

Gibbs Free Energy (G)= -408.8064 0.07880  
Entropy (S)= 0.00015449

-----  
Frequencies -- 21.0567 159.7853 225.8619

### CH<sub>2</sub>CHBn + H anion

-----  
Using Gaussian 16: ES64L-G16RevA.03 25-Dec-2016

=====

```
# b3lyp/6-31G(d) gfpint ginput scf=(direct,tight,maxcycle=300,xqc)
opt=(maxcycle=250) freq=noraman SCRF=(PCM,SOLVENT=1,4-dioxane) iop(1/8=18)
Temperature=393.15
#N Geom=AllCheck Guess=TCheck SCRF=Check Test GenChk RB3LYP/6-31G(d) Freq
```

-----  
Pointgroup= C1 Stoichiometry= C9H10 C1[X(C9H10)] #Atoms= 19  
Charge = 0 Multiplicity = 1

-----  
SCF Energy= -348.958215881 Predicted Change= -4.014581D-10

=====

```
Optimization completed. {Found 2 times}
Item Max Val. Criteria Pass? RMS Val. Criteria Pass?
Force 0.00000 || 0.00045 [ YES ] 0.00000 || 0.00030 [ YES ]
Displ 0.00023 || 0.00180 [ YES ] 0.00023 || 0.00180 [ YES ]
```

-----  
Atomic Coordinates (Angstroms)  
Type X Y Z

-----

|   |           |           |           |
|---|-----------|-----------|-----------|
| C | 2.415023  | -0.182342 | -0.499262 |
| C | 1.429745  | -0.807632 | 0.457184  |
| H | 1.470161  | -1.901325 | 0.358517  |
| C | -0.005016 | -0.353307 | 0.228014  |
| H | 1.734695  | -0.576772 | 1.487043  |
| C | -1.027875 | -1.281549 | 0.000299  |
| C | -2.346528 | -0.863619 | -0.196132 |
| C | -2.661063 | 0.495493  | -0.169279 |
| C | -1.648168 | 1.432113  | 0.054221  |
| C | -0.333076 | 1.010124  | 0.248490  |
| H | -0.790607 | -2.343113 | -0.021269 |
| H | -3.125794 | -1.600988 | -0.371360 |
| H | -3.685722 | 0.823709  | -0.322378 |
| H | -1.883052 | 2.493325  | 0.075416  |
| H | 0.452800  | 1.743434  | 0.412791  |
| H | 2.218903  | -0.355176 | -1.558177 |
| C | 3.470368  | 0.549790  | -0.139136 |
| H | 3.697925  | 0.748764  | 0.906588  |
| H | 4.150236  | 0.973711  | -0.873563 |

-----  
Statistical Thermodynamic Analysis

Temperature= 393.150 Kelvin Pressure= 1.00000 Atm

```

=====
SCF Energy= -348.958215881 Predicted Change= -4.014581D-10
Zero-point correction (ZPE)= -348.7961 0.16209
Internal Energy (U)= -348.7825 0.17566
Enthalpy (H)= -348.7813 0.17691
Gibbs Free Energy (G)= -348.8445 0.11370
Entropy (S)= 0.00016078
=====

```

```

-----
Frequencies -- 29.8010 80.7421 147.4957
-----

```

### CH<sub>2</sub>CHPh + H anion

```

-----
Using Gaussian 16: ES64L-G16RevA.03 25-Dec-2016
=====

```

```

# b3lyp/6-31G(d) gfpri n gfinpu t scf=(direct,tight,maxcycle=300,xqc)
opt=(maxcycle=250) freq=noraman SCRF=(PCM,SOLVENT=1,4-dioxane) iop(1/8=18)
Temperature=393.15
#N Geom=AllCheck Guess=TCheck SCRF=Check Test GenChk RB3LYP/6-31G(d) Freq
-----

```

```

Pointgroup= C1 Stoichiometry= C8H8 C1[X(C8H8)] #Atoms= 16
Charge = 0 Multiplicity = 1
-----

```

```

SCF Energy= -309.649584146 Predicted Change= -3.076375D-09
=====

```

```

Optimization completed. {Found 2 times}
Item Max Val. Criteria Pass? RMS Val. Criteria Pass?
Force 0.00001 || 0.00045 [ YES ] 0.00000 || 0.00030 [ YES ]
Displ 0.00052 || 0.00180 [ YES ] 0.00052 || 0.00180 [ YES ]
-----

```

```

Atomic Coordinates (Angstroms)
Type X Y Z
-----
C 1.955182 -0.529814 0.000118
C 0.515264 -0.220515 0.000068
H 2.186617 -1.595174 0.000287
C 2.977659 0.335307 -0.000135
H 2.840465 1.413419 -0.000401
H 4.004692 -0.017048 -0.000126
C -0.406459 -1.281922 -0.000002
H -0.035235 -2.304398 -0.000026
C -1.781235 -1.046518 -0.000065
H -2.472407 -1.885245 -0.000106
C -2.265728 0.261940 -0.000051
H -3.335795 0.450711 -0.000107
C -1.362420 1.330047 0.000026
H -1.730588 2.352721 0.000050
C 0.009134 1.092956 0.000084
H 0.693865 1.936124 0.000170
-----

```

Statistical Thermodynamic Analysis

Temperature= 393.150 Kelvin    Pressure= 1.00000 Atm

SCF Energy= -309.649584146    Predicted Change= -3.076375D-09  
 Zero-point correction (ZPE)= -309.5158    0.13373  
 Internal Energy (U)= -309.5044    0.14510  
 Enthalpy (H)= -309.5032    0.14634  
 Gibbs Free Energy (G)= -309.5604    0.08917  
 Entropy (S)= 0.00014543

Frequencies -- 45.6840            208.2377            239.8721

*Noteworthy Structures*

**Substrate**

Using Gaussian 16: ES64L-G16RevA.03 25-Dec-2016

```
# b3lyp/6-31G(d) gfpri nt gfinpu t scf=(direct,tight,maxcycle=300,xqc)
opt=(maxcycle=250) freq=noraman SCRF=(PCM,SOLVENT=1,4-dioxane) iop(1/8=18)
Temperature=393.15
#N Geom=AllCheck Guess=TChe ck SCRF=Check Test GenChk RB3LYP/6-31G(d) Freq
```

Pointgroup= C1    Stoichiometry= C10H10F2    C1[X(C10H10F2)]    #Atoms= 22  
 Charge = 0    Multiplicity = 1

SCF Energy= -586.742092055            Predicted Change= -2.042220D-08

Optimization completed.            {Found    1    times}  
 Item    Max Val.    Criteria    Pass?    RMS Val.    Criteria    Pass?  
 Force    0.00000 || 0.00045 [ YES ]    0.00000 || 0.00030 [ YES ]  
 Displ    0.00435 || 0.00180 [ NO ]    0.00435 || 0.00180 [ NO ]

| Atomic Type | Coordinates (Angstroms) |           |           |
|-------------|-------------------------|-----------|-----------|
|             | X                       | Y         | Z         |
| C           | 3.383795                | 0.062490  | -0.116256 |
| F           | 3.308296                | 1.337743  | -0.492404 |
| F           | 4.639876                | -0.238664 | 0.202581  |
| C           | 2.365741                | -0.783758 | -0.070826 |
| H           | 2.590871                | -1.792582 | 0.261403  |
| C           | 0.949856                | -0.421405 | -0.423270 |
| H           | 0.592497                | -1.078612 | -1.227823 |
| H           | 0.909183                | 0.600412  | -0.814661 |
| C           | -0.016264               | -0.548538 | 0.781417  |
| H           | 0.327297                | 0.121187  | 1.578942  |
| H           | 0.044659                | -1.569644 | 1.179238  |
| C           | -1.448200               | -0.225525 | 0.411863  |
| C           | -1.931169               | 1.088153  | 0.491520  |

|   |           |           |           |
|---|-----------|-----------|-----------|
| H | -1.275845 | 1.876199  | 0.857059  |
| C | -3.239611 | 1.396226  | 0.115475  |
| H | -3.595656 | 2.420619  | 0.189288  |
| C | -4.090454 | 0.390863  | -0.348759 |
| H | -5.110557 | 0.628010  | -0.638824 |
| C | -3.623023 | -0.922361 | -0.432153 |
| H | -4.279218 | -1.713121 | -0.786743 |
| C | -2.313654 | -1.224878 | -0.054491 |
| H | -1.958873 | -2.251777 | -0.116593 |

---

Statistical Thermodynamic Analysis

Temperature= 393.150 Kelvin    Pressure= 1.00000 Atm

---

SCF Energy= -586.742092055    Predicted Change= -2.042220D-08  
 Zero-point correction (ZPE)= -586.5663    0.17575  
 Internal Energy (U)= -586.5484    0.19364  
 Enthalpy (H)= -586.5471    0.19489  
 Gibbs Free Energy (G)= -586.6231    0.11895  
 Entropy (S)= 0.00019317

---

Frequencies -- 22.6501            40.4633            59.5960

**PdCl<sub>2</sub>**

---

Using Gaussian 16: ES64L-G16RevA.03 25-Dec-2016

---

```
# b3lyp/gen pseudo=read 6D 10F gfprint ginput
scf=(direct,tight,maxcycle=300,xqc) opt=(maxcycle=250) freq=noraman
SCRF=(PCM,SOLVENT=1,4-dioxane) iop(1/8=18) Temperature=393.15
#N Geom=AllCheck Guess=TCheck SCRf=Check Test GenChk RB3LYP/ChkBas Freq
```

---

Pointgroup= CS    Stoichiometry= Cl2Pd    CS[SG(Cl2Pd)]    #Atoms= 3  
 Charge = 0    Multiplicity = 1

---

SCF Energy= -1047.16179115    Predicted Change= -1.331833D-08

---

Optimization completed.    {Found 2 times}  
 Item    Max Val.    Criteria    Pass?    RMS Val.    Criteria    Pass?  
 Force    0.00002 || 0.00045 [ YES ]    0.00002 || 0.00030 [ YES ]  
 Displ    0.00041 || 0.00180 [ YES ]    0.00041 || 0.00180 [ YES ]

---

| Atomic Coordinates (Angstroms) |           |           |           |
|--------------------------------|-----------|-----------|-----------|
| Type                           | X         | Y         | Z         |
| Cl                             | 1.650801  | -0.880575 | -0.000000 |
| Cl                             | -1.650801 | -0.880634 | 0.000000  |
| Pd                             | -0.000000 | 0.650881  | -0.000000 |

---

Statistical Thermodynamic Analysis

Temperature= 393.150 Kelvin Pressure= 1.00000 Atm

---

---

SCF Energy= -1047.16179115 Predicted Change= -1.331833D-08  
Zero-point correction (ZPE)= -1047.1598 0.00191  
Internal Energy (U)= -1047.1539 0.00783  
Enthalpy (H)= -1047.1527 0.00907  
Gibbs Free Energy (G)= -1047.2010 -0.03928  
Entropy (S)= 0.00012301

---

Frequencies -- 139.9257 343.8746 357.5210

### Ph Radical

---

Using Gaussian 16: ES64L-G16RevA.03 25-Dec-2016

---

# b3lyp/6-31G(d) gfpint gfinput scf=(direct,tight,maxcycle=300,xqc)  
guess=(mix,always) opt=(maxcycle=250) freq=noraman  
SCRF=(PCM,SOLVENT=1,4-dioxane) iop(1/8=18) Temperature=393.15  
#N Geom=AllCheck Guess=TCheck SCRF=Check Test GenChk UB3LYP/6-31G(d) Freq

---

Pointgroup= C1 Stoichiometry= C6H5(2) C1[X(C6H5)] #Atoms= 11  
Charge = 0 Multiplicity = 2

---

SCF Energy= -231.562342746 Predicted Change= -4.724579D-08

---

Optimization completed. {Found 2 times}  
Item Max Val. Criteria Pass? RMS Val. Criteria Pass?  
Force 0.00004 || 0.00045 [ YES ] 0.00002 || 0.00030 [ YES ]  
Displ 0.00034 || 0.00180 [ YES ] 0.00034 || 0.00180 [ YES ]

---

| Atomic Type | Coordinates (Angstroms) |           |           |
|-------------|-------------------------|-----------|-----------|
|             | X                       | Y         | Z         |
| C           | 0.000003                | 1.324922  | -0.000000 |
| H           | 0.000026                | 2.411419  | 0.000002  |
| C           | 1.214573                | 0.632764  | -0.000023 |
| H           | 2.155061                | 1.179020  | -0.000029 |
| C           | 1.226945                | -0.772114 | 0.000026  |
| C           | -0.000010               | -1.400119 | 0.000002  |
| H           | 2.163715                | -1.323126 | 0.000018  |
| C           | -1.226949               | -0.772108 | -0.000029 |
| H           | -2.163732               | -1.323097 | -0.000014 |
| H           | -2.155057               | 1.179025  | 0.000036  |
| C           | -1.214564               | 0.632782  | 0.000022  |

---

### Statistical Thermodynamic Analysis

Temperature= 393.150 Kelvin Pressure= 1.00000 Atm

---

SCF Energy= -231.562342746 Predicted Change= -4.724579D-08

Zero-point correction (ZPE)= -231.4747 0.08760  
Internal Energy (U)= -231.4673 0.09499  
Enthalpy (H)= -231.4661 0.09624  
Gibbs Free Energy (G)= -231.5138 0.04847  
Entropy (S)= 0.0001215

-----  
Frequencies -- 402.4224 426.8693 600.1701

### Cl Radical

-----  
Using Gaussian 16: ES64L-G16RevA.03 25-Dec-2016

=====

```
# b3lyp/6-31G(d) gfpint gfinput scf=(direct,tight,maxcycle=300,xqc)
opt=(maxcycle=250) freq=noraman SCRF=(PCM,SOLVENT=1,4-dioxane) iop(1/8=18)
Temperature=393.15
#N Geom=AllCheck Guess=TCheck SCRF=Check Test GenChk UB3LYP/6-31G(d) Freq
```

-----  
Pointgroup= OH Stoichiometry= Cl(2) OH[O(Cl)] #Atoms= 1  
Charge = 0 Multiplicity = 2

-----  
SCF Energy= -460.136699740 Predicted Change= -0.000000D+00

=====

```
Optimization completed. {Found 2 times}
Item Max Val. Criteria Pass? RMS Val. Criteria Pass?
Force 0.00000 || 0.00045 [ YES ] 0.00000 || 0.00030 [ YES ]
Displ 0.00000 || 0.00180 [ YES ] 0.00000 || 0.00180 [ YES ]
```

-----  
Atomic Coordinates (Angstroms)  
Type X Y Z

|    |          |          |          |
|----|----------|----------|----------|
| Cl | 0.000000 | 0.000000 | 0.000000 |
|----|----------|----------|----------|

-----  
Statistical Thermodynamic Analysis  
Temperature= 393.150 Kelvin Pressure= 1.00000 Atm

=====

```
SCF Energy= -460.136699740 Predicted Change= -0.000000D+00
Zero-point correction (ZPE)= -460.1367 0.00000
Internal Energy (U)= -460.1348 0.00186
Enthalpy (H)= -460.1335 0.00311
Gibbs Free Energy (G)= -460.1582 -0.02153
Entropy (S)= 6.269e-05
```

### Arylated Substrate Pd<sup>III</sup>

-----  
Using Gaussian 16: ES64L-G16RevA.03 25-Dec-2016

=====

```
# b3lyp/gen pseudo=read 6D 10F gfpint gfinput
scf=(direct,tight,maxcycle=300,xqc) opt=(maxcycle=250) freq=noraman
```

SCRF=(PCM,SOLVENT=1,4-dioxane) iop(1/8=18) Temperature=393.15  
#N Geom=AllCheck Guess=TCheck SCRF=Check Test GenChk UB3LYP/ChkBas Freq

Pointgroup= C1 Stoichiometry= C16H15Cl2F2Pd(2) C1[X(C16H15Cl2F2Pd)] #Atoms= 36  
Charge = 0 Multiplicity = 2

SCF Energy= -1865.60631764 Predicted Change= -6.557508D-09

Optimization completed. {Found 2 times}  
Item Max Val. Criteria Pass? RMS Val. Criteria Pass?  
Force 0.00003 || 0.00045 [ YES ] 0.00000 || 0.00030 [ YES ]  
Displ 0.00062 || 0.00180 [ YES ] 0.00062 || 0.00180 [ YES ]

| Atomic Type | Coordinates (Angstroms) |           |           |
|-------------|-------------------------|-----------|-----------|
|             | X                       | Y         | Z         |
| C           | 1.607461                | 1.637814  | -0.175524 |
| C           | 2.614129                | 0.549335  | 0.117938  |
| F           | 1.376216                | 2.380951  | 0.950401  |
| F           | 2.136161                | 2.518762  | -1.110248 |
| C           | 0.281417                | 1.171423  | -0.783842 |
| H           | 0.481189                | 0.799006  | -1.789993 |
| C           | -0.829939               | 2.202749  | -0.737802 |
| H           | -0.416264               | 3.093484  | -1.238935 |
| H           | -1.042102               | 2.488026  | 0.294501  |
| C           | -2.129983               | 1.795103  | -1.461824 |
| H           | -1.897376               | 1.503234  | -2.493499 |
| H           | -2.776016               | 2.678229  | -1.516358 |
| C           | -2.867466               | 0.675986  | -0.763899 |
| C           | -3.827568               | 0.934823  | 0.218205  |
| H           | -4.071790               | 1.962812  | 0.471941  |
| C           | -4.470494               | -0.111745 | 0.879144  |
| H           | -5.213925               | 0.112683  | 1.638768  |
| C           | -4.167042               | -1.449451 | 0.579103  |
| H           | -4.679958               | -2.253223 | 1.098268  |
| C           | -3.225339               | -1.732741 | -0.398579 |
| H           | -2.998891               | -2.758172 | -0.675259 |
| C           | -2.567416               | -0.676679 | -1.072117 |
| H           | -1.975331               | -0.906800 | -1.952810 |
| C           | 3.490722                | 0.118804  | -0.884479 |
| H           | 3.468249                | 0.588856  | -1.861685 |
| C           | 4.393579                | -0.908028 | -0.620621 |
| H           | 5.074886                | -1.238165 | -1.399340 |
| C           | 4.425286                | -1.512497 | 0.641072  |
| H           | 5.130188                | -2.314822 | 0.840004  |
| C           | 3.557388                | -1.080002 | 1.642887  |
| H           | 3.586942                | -1.535995 | 2.628238  |
| C           | 2.651658                | -0.046507 | 1.388617  |
| H           | 1.987698                | 0.306218  | 2.169753  |



|    |           |           |           |
|----|-----------|-----------|-----------|
| Pd | -0.292124 | -0.620892 | 0.116169  |
| Cl | 0.485883  | -1.934325 | -1.713537 |
| Cl | -0.865267 | 0.318321  | 2.211865  |

---

Statistical Thermodynamic Analysis

Temperature= 393.150 Kelvin    Pressure= 1.00000 Atm

---

SCF Energy= -1865.60631764    Predicted Change= -6.557508D-09  
Zero-point correction (ZPE)= -1865.3342    0.27204  
Internal Energy (U)= -1865.3005    0.30580  
Enthalpy (H)= -1865.2992    0.30705  
Gibbs Free Energy (G)= -1865.4112    0.19508  
Entropy (S)= 0.0002848

---

Frequencies -- 36.1154                    40.9199                    49.9966

**Arylated Substrate Pd<sup>III</sup> Ph & Bn Groups Exchanged**

---

Using Gaussian 16: ES64L-G16RevA.03 25-Dec-2016

---

```
# b3lyp/gen pseudo=read 6D 10F gfprint ginput
scf=(direct,tight,maxcycle=300,xqc) opt=(maxcycle=250) freq=noraman
SCRF=(PCM,SOLVENT=1,4-dioxane) iop(1/8=18) Temperature=393.15
#N Geom=AllCheck Guess=TCheck SCRF=Check Test GenChk UB3LYP/ChkBas Freq
```

---

Pointgroup= C1    Stoichiometry= C16H15Cl2F2Pd(2)    C1[X(C16H15Cl2F2Pd)]    #Atoms= 36  
Charge = 0    Multiplicity = 2

---

SCF Energy= -1865.60345838                    Predicted Change= -1.253719D-09

---

Optimization completed.                    {Found    2    times}  
Item    Max Val.    Criteria    Pass?    RMS Val.    Criteria    Pass?  
Force    0.00000 || 0.00045 [ YES ]    0.00000 || 0.00030 [ YES ]  
Displ    0.00061 || 0.00180 [ YES ]    0.00061 || 0.00180 [ YES ]

---

| Atomic<br>Type | Coordinates (Angstroms) |           |           |
|----------------|-------------------------|-----------|-----------|
|                | X                       | Y         | Z         |
| C              | -0.337176               | 1.737641  | 0.087493  |
| C              | 0.654460                | 2.256100  | -0.951802 |
| H              | 0.192731                | 2.150517  | -1.938043 |
| C              | 1.975993                | 1.519703  | -0.895072 |
| H              | 0.792081                | 3.324994  | -0.761398 |
| F              | 0.137333                | 2.022549  | 1.347457  |
| F              | -1.511076               | 2.442417  | -0.043438 |
| C              | -0.669674               | 0.245573  | -0.011719 |
| H              | -0.846863               | -0.040255 | -1.049971 |
| C              | -1.759201               | -0.276614 | 0.919145  |
| H              | -1.710719               | 0.246591  | 1.877182  |

|    |           |           |           |
|----|-----------|-----------|-----------|
| H  | -1.564713 | -1.331774 | 1.121635  |
| C  | -3.138289 | -0.146500 | 0.281650  |
| Pd | 1.161654  | -0.708866 | 0.277088  |
| Cl | 0.445159  | -2.554228 | -1.099866 |
| Cl | 0.961574  | -1.370589 | 2.538403  |
| C  | -3.558910 | -1.089926 | -0.667230 |
| H  | -2.891149 | -1.902112 | -0.946354 |
| C  | -4.828129 | -1.003967 | -1.239985 |
| H  | -5.142492 | -1.747308 | -1.967741 |
| C  | -5.695556 | 0.026136  | -0.868965 |
| H  | -6.686845 | 0.090480  | -1.309490 |
| C  | -5.284530 | 0.969749  | 0.074865  |
| H  | -5.955376 | 1.771431  | 0.372241  |
| C  | -4.011768 | 0.887256  | 0.641558  |
| H  | -3.694588 | 1.627794  | 1.370372  |
| C  | 2.235560  | 0.437761  | -1.769350 |
| H  | 1.506190  | 0.167577  | -2.527402 |
| C  | 3.479277  | -0.222557 | -1.739925 |
| H  | 3.661660  | -1.042237 | -2.427291 |
| C  | 4.457719  | 0.175535  | -0.833927 |
| H  | 5.417520  | -0.331163 | -0.810252 |
| C  | 4.202343  | 1.236502  | 0.047719  |
| H  | 4.964596  | 1.547587  | 0.755681  |
| C  | 2.975542  | 1.897012  | 0.024396  |
| H  | 2.785146  | 2.716483  | 0.710395  |

---

Statistical Thermodynamic Analysis

Temperature= 393.150 Kelvin    Pressure= 1.00000 Atm

---

SCF Energy= -1865.60345838    Predicted Change= -1.253719D-09

Zero-point correction (ZPE)= -1865.3318    0.27159

Internal Energy (U)= -1865.2975    0.30589

Enthalpy (H)= -1865.2963    0.30714

Gibbs Free Energy (G)= -1865.4124    0.19096

Entropy (S)= 0.00029552

---

Frequencies --    18.1599                    30.3332                    49.6524

**Arylated Substrate Pd<sup>II</sup>**

---

Using Gaussian 16: ES64L-G16RevA.03 25-Dec-2016

---

# b3lyp/gen pseudo=read 6D 10F gffprint gffinput

scf=(direct,tight,maxcycle=300,xqc) opt=(maxcycle=250) freq=noraman

SCRF=(PCM,SOLVENT=1,4-dioxane) iop(1/8=18) Temperature=393.15

#N Geom=AllCheck Guess=TChech SCRF=Check Test GenChk RB3LYP/ChkBas Freq

---

Pointgroup= C1    Stoichiometry= C16H15ClF2Pd    C1[X(C16H15ClF2Pd)]    #Atoms= 35

Charge = 0    Multiplicity = 1

-----  
SCF Energy= -1405.41278866      Predicted Change= -5.966931D-10  
-----

Optimization completed.      {Found      2      times}  
Item    Max Val.    Criteria    Pass?    RMS Val.    Criteria    Pass?  
Force    0.00000 || 0.00045 [ YES ]    0.00000 || 0.00030 [ YES ]  
Displ    0.00005 || 0.00180 [ YES ]    0.00005 || 0.00180 [ YES ]  
-----

Atomic      Coordinates (Angstroms)  
Type    X      Y      Z  
-----  
C      1.352931    1.411271    0.320268  
C      2.537271    0.475971    0.344968  
F      0.812751    1.510801    1.593488  
F      1.822511    2.689961    0.025768  
C      0.221831    1.150001    -0.677272  
H      0.646871    0.929531    -1.658742  
C      -0.776129    2.325181    -0.716312  
H      -0.410809    3.071481    -1.432142  
H      -0.789499    2.821801    0.258208  
C      -2.198149    1.905661    -1.097422  
H      -2.233449    1.601811    -2.150032  
H      -2.872789    2.768411    -1.000692  
C      -2.717729    0.756491    -0.247162  
C      -2.288609    0.557651    1.096948  
H      -1.611569    1.259011    1.570758  
C      -2.891389    -0.447219    1.898398  
H      -2.562469    -0.567249    2.926408  
C      -3.889559    -1.251369    1.379348  
H      -4.344479    -2.025149    1.990388  
C      -4.331319    -1.051869    0.052588  
H      -5.121999    -1.678679    -0.349882  
C      -3.765989    -0.068129    -0.739002  
H      -4.115509    0.081251    -1.757082  
C      3.481881    0.546561    -0.684762  
H      3.357681    1.269791    -1.485212  
C      4.586431    -0.302869    -0.678522  
H      5.315271    -0.244739    -1.482082  
C      4.757181    -1.222169    0.359168  
H      5.618191    -1.884979    0.362818  
C      3.820251    -1.286119    1.391158  
H      3.950221    -1.996089    2.203228  
C      2.712881    -0.437589    1.386968  
H      1.987671    -0.484559    2.191698  
Pd     -0.777089    -0.582419    -0.246572  
Cl     0.679101    -2.017999    -1.397342  
-----

Statistical Thermodynamic Analysis  
Temperature= 393.150 Kelvin      Pressure= 1.00000 Atm

---

---

SCF Energy= -1405.41278866 Predicted Change= -5.966931D-10  
Zero-point correction (ZPE)= -1405.1418 0.27095  
Internal Energy (U)= -1405.1110 0.30177  
Enthalpy (H)= -1405.1097 0.30302  
Gibbs Free Energy (G)= -1405.2139 0.19883  
Entropy (S)= 0.00026502

---

Frequencies -- 28.4308 35.5052 49.4276

### Arylated Substrate Pd<sup>II</sup> Ph & Bn Groups Exchanged

---

Using Gaussian 16: ES64L-G16RevA.03 25-Dec-2016

---

# b3lyp/gen pseudo=read 6D 10F gffprint gffinput  
scf=(direct,tight,maxcycle=300,xqc) opt=(maxcycle=250) freq=noraman  
SCRF=(PCM,SOLVENT=1,4-dioxane) iop(1/8=18) Temperature=393.15  
#N Geom=AllCheck Guess=TCheck SCRF=Check Test GenChk UB3LYP/ChkBas Freq

---

Pointgroup= C1 Stoichiometry= C16H15Cl2F2Pd(2) C1[X(C16H15Cl2F2Pd)] #Atoms= 36  
Charge = 0 Multiplicity = 2

---

SCF Energy= -1865.60345838 Predicted Change= -1.253719D-09

---

Optimization completed. {Found 2 times}  
Item Max Val. Criteria Pass? RMS Val. Criteria Pass?  
Force 0.00000 || 0.00045 [ YES ] 0.00000 || 0.00030 [ YES ]  
Displ 0.00061 || 0.00180 [ YES ] 0.00061 || 0.00180 [ YES ]

---

| Atomic Type | Coordinates (Angstroms) |           |           |
|-------------|-------------------------|-----------|-----------|
|             | X                       | Y         | Z         |
| C           | -0.337176               | 1.737641  | 0.087493  |
| C           | 0.654460                | 2.256100  | -0.951802 |
| H           | 0.192731                | 2.150517  | -1.938043 |
| C           | 1.975993                | 1.519703  | -0.895072 |
| H           | 0.792081                | 3.324994  | -0.761398 |
| F           | 0.137333                | 2.022549  | 1.347457  |
| F           | -1.511076               | 2.442417  | -0.043438 |
| C           | -0.669674               | 0.245573  | -0.011719 |
| H           | -0.846863               | -0.040255 | -1.049971 |
| C           | -1.759201               | -0.276614 | 0.919145  |
| H           | -1.710719               | 0.246591  | 1.877182  |
| H           | -1.564713               | -1.331774 | 1.121635  |
| C           | -3.138289               | -0.146500 | 0.281650  |
| Pd          | 1.161654                | -0.708866 | 0.277088  |
| Cl          | 0.445159                | -2.554228 | -1.099866 |
| Cl          | 0.961574                | -1.370589 | 2.538403  |
| C           | -3.558910               | -1.089926 | -0.667230 |

|   |           |           |           |
|---|-----------|-----------|-----------|
| H | -2.891149 | -1.902112 | -0.946354 |
| C | -4.828129 | -1.003967 | -1.239985 |
| H | -5.142492 | -1.747308 | -1.967741 |
| C | -5.695556 | 0.026136  | -0.868965 |
| H | -6.686845 | 0.090480  | -1.309490 |
| C | -5.284530 | 0.969749  | 0.074865  |
| H | -5.955376 | 1.771431  | 0.372241  |
| C | -4.011768 | 0.887256  | 0.641558  |
| H | -3.694588 | 1.627794  | 1.370372  |
| C | 2.235560  | 0.437761  | -1.769350 |
| H | 1.506190  | 0.167577  | -2.527402 |
| C | 3.479277  | -0.222557 | -1.739925 |
| H | 3.661660  | -1.042237 | -2.427291 |
| C | 4.457719  | 0.175535  | -0.833927 |
| H | 5.417520  | -0.331163 | -0.810252 |
| C | 4.202343  | 1.236502  | 0.047719  |
| H | 4.964596  | 1.547587  | 0.755681  |
| C | 2.975542  | 1.897012  | 0.024396  |
| H | 2.785146  | 2.716483  | 0.710395  |

---

#### Statistical Thermodynamic Analysis

Temperature= 393.150 Kelvin    Pressure= 1.00000 Atm

---

SCF Energy= -1865.60345838    Predicted Change= -1.253719D-09

Zero-point correction (ZPE)= -1865.3318    0.27159

Internal Energy (U)= -1865.2975    0.30589

Enthalpy (H)= -1865.2963    0.30714

Gibbs Free Energy (G)= -1865.4124    0.19096

Entropy (S)= 0.00029552

---

Frequencies --    18.1599                    30.3332                    49.6524

## 8. References

<sup>i</sup> Becke, A. D. Density-functional thermochemistry. III. The role of exact exchange. *J. Chem. Phys.*, **98**, 5648–5652, (1993).

<sup>ii</sup> (a) Hay, P. J. & Wadt, W. R. Ab initio effective core potentials for molecular calculations – potentials for the transition metal atoms Sc to Hg. *J. Chem. Phys.*, **82**, 270–283, (1985). (b) Wadt, W. R. & Hay, P. J. Ab initio effective core potentials for molecular calculations – potentials for main group elements Na to Bi. *J. Chem. Phys.*, **82**, 284–298, (1985). (c) Hay, P. J. & Wadt, W. R. Ab initio effective core potentials for molecular calculations – potentials for K to Au including the outermost core orbitals. *J. Chem. Phys.*, **82**, 299–310, (1985).

<sup>iii</sup> Grimme, S., Ehrlich, S., Goerigk, L. Effect of the damping function in dispersion corrected density functional theory. *J. Comput. Chem.*, **32**, 1456–1465, (2011).

<sup>iv</sup> S. Miertuš, E. Scrocco, and J. Tomasi, “Electrostatic Interaction of a Solute with a Continuum. A Direct Utilization of ab initio Molecular Potentials for the Prevision of Solvent Effects,” *Chem. Phys.*, **55** (1981) 117-29.

<sup>v</sup> Grimme, S.; Ehrlich, S.; Goerigk, L. Effect of the damping function in dispersion corrected density functional theory. *J. Comput. Chem.*, **32**, 1456–1465, (2011).

<sup>vi</sup> C. Y. Legault, CYLview, 1.0b. Université de Sherbrooke; 2009. <http://www.cylview.org>.
